# Supplementary material for: Ruthenium macrocycles bearing pyridine bis(carboxamide): synthesis, structure, and catalytic activity for hydrosilylation
Source: Royal Society of Chemistry journal article supplement (doi:10.1039/d0nj06133f), 2021-01-01
Supplement: d0nj06133f1.pdf [file d0nj06133f1.pdf]

*Supplementary Information*

**Ruthenium macrocycles bearing pyridine bis(carboxamide): Synthesis, structure, and catalytic activity for hydrosilylation**

Hiroki Sato,<sup>a</sup> Tadashi Tsukamoto,<sup>a</sup> Hiromitsu Sogawa,<sup>a,b</sup> Shigeki Kuwata<sup>a</sup> and Toshikazu Takata<sup>\*a,c</sup>

<sup>a</sup>Department of Chemical Science and Engineering, Tokyo Institute of Technology, Ookayama, Meguro-ku, Tokyo 152-8552, Japan

<sup>b</sup>Department of Chemistry and Materials Engineering, Faculty of Chemistry, Materials and Bioengineering, Kansai University, Suita, Osaka, 564-8680, Japan

<sup>c</sup>Graduate School of Advanced Science and Engineering, Hiroshima University, Kagamiyama, Higashi-Hiroshima, Hiroshima 739-8527, Japan

Corresponding author: [takatats@hiroshima-u.ac.jp](mailto:takatats@hiroshima-u.ac.jp)

Content

1. Supplementary Schemes, Tables and Figures
2. X-ray crystallographic analysis
3. Reference

## 1. Supplementary Schemes, Tables and Figures

Scheme S1

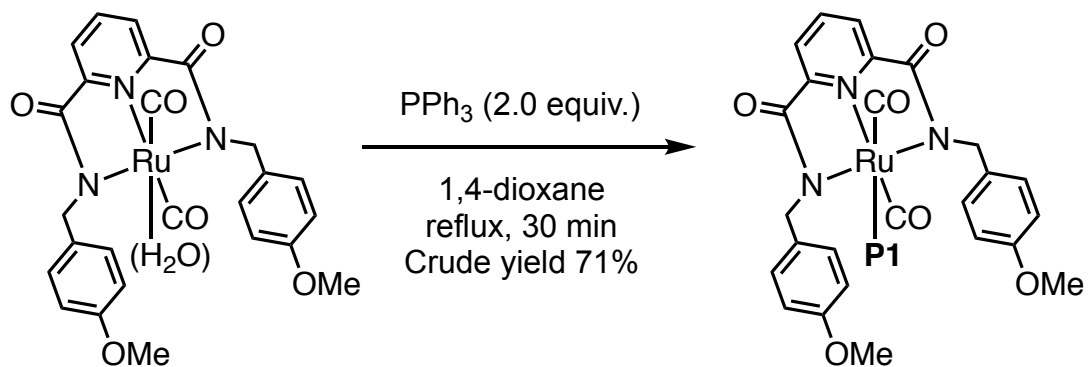

Scheme S2

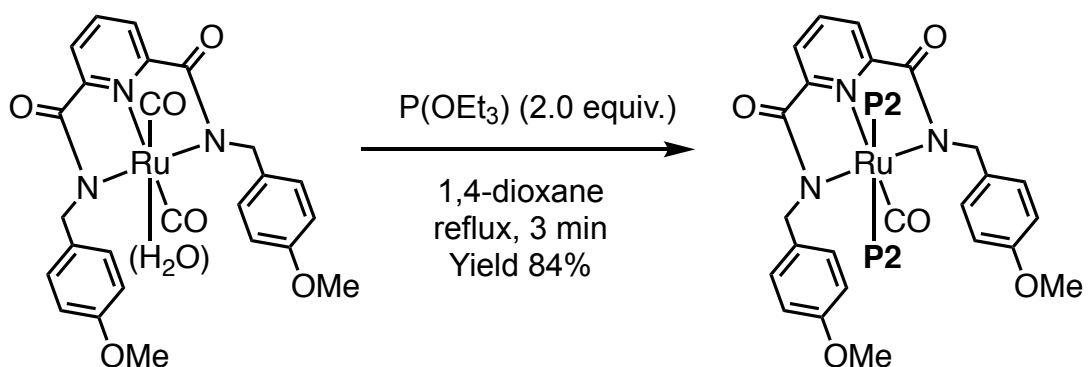

**Table S1.** Detailed conditions for the synthesis of Ru(**MC33**)(CO)<sub>2</sub>(H<sub>2</sub>O)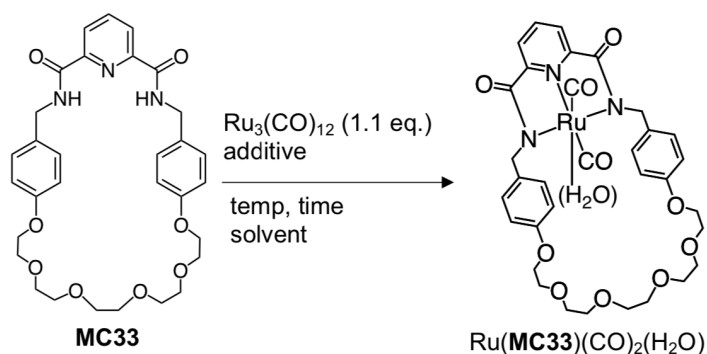

| entry           | Ru source                                          | solvent | additive                                      | temp. / °C | time   | result                  |
|-----------------|----------------------------------------------------|---------|-----------------------------------------------|------------|--------|-------------------------|
| 1               | RuCl <sub>2</sub> (PPh <sub>3</sub> ) <sub>3</sub> | toluene | NEt <sub>3</sub> (10 v/v%)                    | 90         | 19 h   | NR                      |
| 2               | RuCl <sub>2</sub> (dmsO) <sub>4</sub>              | 2-ee    | Cs <sub>2</sub> CO <sub>3</sub> (2.0 equiv.)  | 90         | 19 h   | NR                      |
| 3               | RuCl <sub>2</sub> (dmsO) <sub>4</sub>              | 2-ee    | KOAc (2.2 equiv.)                             | 90         | 12 h   | 45% conv.               |
| 4               | RuCl <sub>2</sub> (dmsO) <sub>4</sub>              | THF     | LDA (2.4 equiv.)                              | 0→60       | 7 h    | NR                      |
| 5               | Ru <sub>3</sub> (CO) <sub>12</sub>                 | diglyme | none                                          | 140        | 17.5 h | 13% conv.               |
| 6               | Ru <sub>3</sub> (CO) <sub>12</sub>                 | DMF     | none                                          | 140        | 8 days | 40% conv.               |
| 7               | Ru <sub>3</sub> (CO) <sub>12</sub>                 | DMF     | none                                          | 140        | 2 days | 50% conv.,<br>10% yield |
| 8               | Ru <sub>3</sub> (CO) <sub>12</sub>                 | DMF     | 1,3,5-triaza-7-phosphaadamantane (1.1 equiv.) | 140        | 3 days | 54% conv.               |
| 9               | Ru <sub>3</sub> (CO) <sub>12</sub>                 | 2-ee    | none                                          | 140        | 2 days | 17% yield               |
| 10              | Ru <sub>3</sub> (CO) <sub>12</sub>                 | 2-ee    | <i>p</i> -tolualdehyde (1.1 equiv.)           | 140        | 19 h   | 32% yield               |
| 11              | Ru <sub>3</sub> (CO) <sub>12</sub>                 | 2-ee    | <i>p</i> -tolualdehyde (2.2 equiv.)           | 140        | 15.5 h | 27% yield               |
| 12              | Ru <sub>3</sub> (CO) <sub>12</sub>                 | 2-ee    | <i>p</i> -tolualdehyde (2.2 equiv.)           | 120        | 19 h   | 22% yield               |
| 13              | Ru <sub>3</sub> (CO) <sub>12</sub>                 | 2-ee    | norbornene (1.1 equiv.)                       | 140        | 2 days | 35% conv.               |
| 14              | Ru <sub>3</sub> (CO) <sub>12</sub>                 | 2-ee    | DIPEA (10 equiv.)                             | 140        | 2 days | NR                      |
| 15              | Ru <sub>3</sub> (CO) <sub>12</sub>                 | 2-ee    | PPh <sub>3</sub> (1.1 equiv.)                 | 140        | 2 days | trace                   |
| 16 <sup>a</sup> | Ru <sub>3</sub> (CO) <sub>12</sub>                 | 2-ee    | CO (1 atm.)                                   | 140        | 3 days | 42% yield               |
| 17 <sup>a</sup> | Ru <sub>3</sub> (CO) <sub>12</sub>                 | 2-ee    | CO (1 atm.)                                   | 140        | 2 days | 97% yield               |

<sup>a</sup>The Ru<sub>3</sub>(CO)<sub>12</sub> and formed Ru(**MC33**)(CO)<sub>2</sub>(H<sub>2</sub>O) gradually decreased by heating, leading to the decrease of the yields by prolonging the reaction time.

**Table S2.** The bond lengths and angles of Ru(**MC33**)(CO<sub>2</sub>)<sub>2</sub>(H<sub>2</sub>O), Ru(**MC33**)(CO<sub>2</sub>)<sub>2</sub>(**P1**), and Ru(**AC**)(CO<sub>2</sub>)<sub>2</sub>(H<sub>2</sub>O)

| compound                                                            | IR (cm <sup>-1</sup> ) |      | X-ray      |            |            |               |               |              |
|---------------------------------------------------------------------|------------------------|------|------------|------------|------------|---------------|---------------|--------------|
|                                                                     | s                      | as   | Ru1-N1 (Å) | Ru1-N2 (Å) | Ru1-N3 (Å) | C-O (Ax.) (Å) | C-O (Eq.) (Å) | ∠N2Ru1N3 (°) |
| Ru( <b>MC33</b> )(CO <sub>2</sub> ) <sub>2</sub> (H <sub>2</sub> O) | 2046                   | 1977 | 2.031(3)   | 2.101(3)   | 2.104(4)   | 1.138(3)      | 1.151(5)      | 155.1(1)     |
| Ru( <b>MC33</b> )(CO <sub>2</sub> ) <sub>2</sub> ( <b>P1</b> )      | 2060                   | 1977 | 2.026(4)   | 2.126(4)   | 2.087(3)   | 1.120(6)      | 1.165(2)      | 154.5(1)     |
| Ru( <b>AC</b> )(CO <sub>2</sub> ) <sub>2</sub> (H <sub>2</sub> O)   | 2046                   | 1977 | 2.024(2)   | 2.112(2)   | 2.100(2)   | 1.146(3)      | 1.144(3)      | 155.3 8)     |

**Table S3.** The bond lengths and angles of Ru(**MC33**)(CO)(**P2**)<sub>2</sub>

| compound                                        | IR (cm <sup>-1</sup> ) |    | X-ray                  |                        |                        |                                |                            |
|-------------------------------------------------|------------------------|----|------------------------|------------------------|------------------------|--------------------------------|----------------------------|
|                                                 | s                      | as | Ru1-N1 /<br>Ru2-N4 (Å) | Ru1-N2 /<br>Ru2-N5 (Å) | Ru1-N3 /<br>Ru2-N6 (Å) | C44-O15 /<br>C88-O30 (Eq.) (Å) | ∠N2Ru1N3 /<br>∠N5Ru2N6 (°) |
| Ru( <b>MC33</b> )(CO)( <b>P2</b> ) <sub>2</sub> | 1959                   | –  | 2.042(3) /<br>2.048(4) | 2.115(4) /<br>2.110(3) | 2.102(3) /<br>2.125(3) | 1.163(5) /<br>1.148(6)         | 154.4(1) /<br>153.5(1)     |

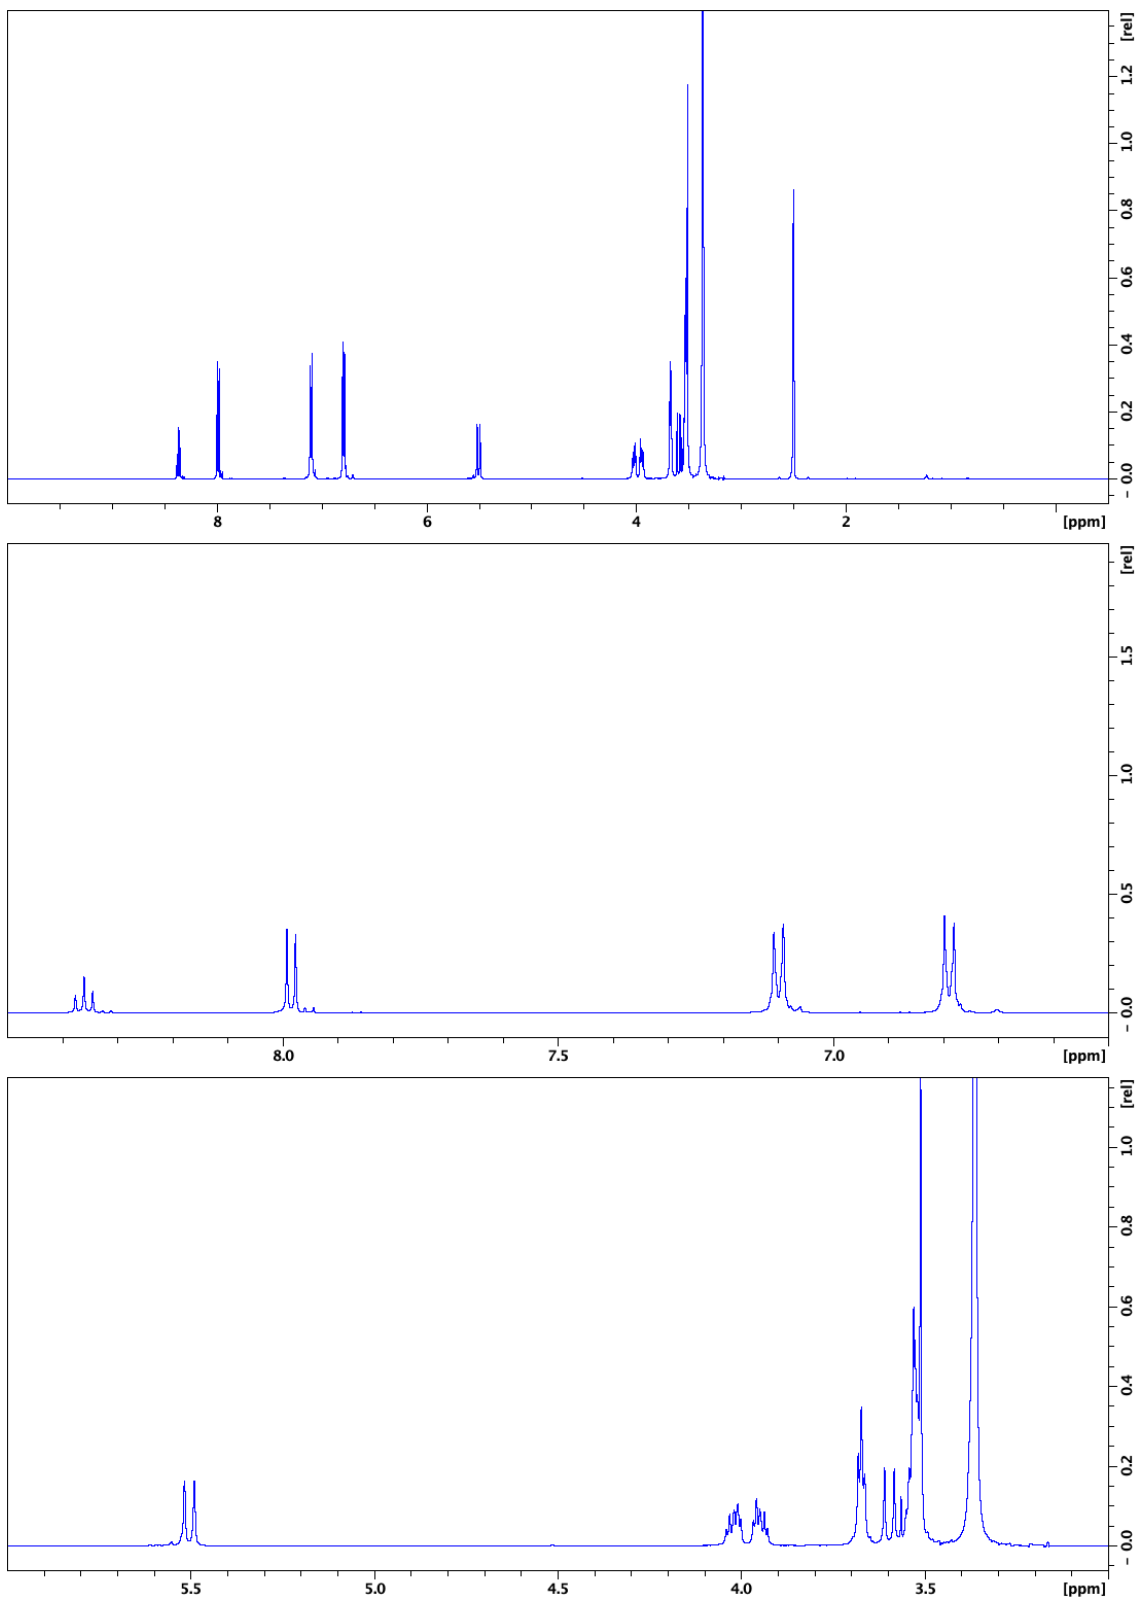

**Fig. S1.** <sup>1</sup>H-NMR spectra of Ru(MC33)(CO)<sub>2</sub>(H<sub>2</sub>O) (500 MHz, DMSO-*d*<sub>6</sub>, r.t.).

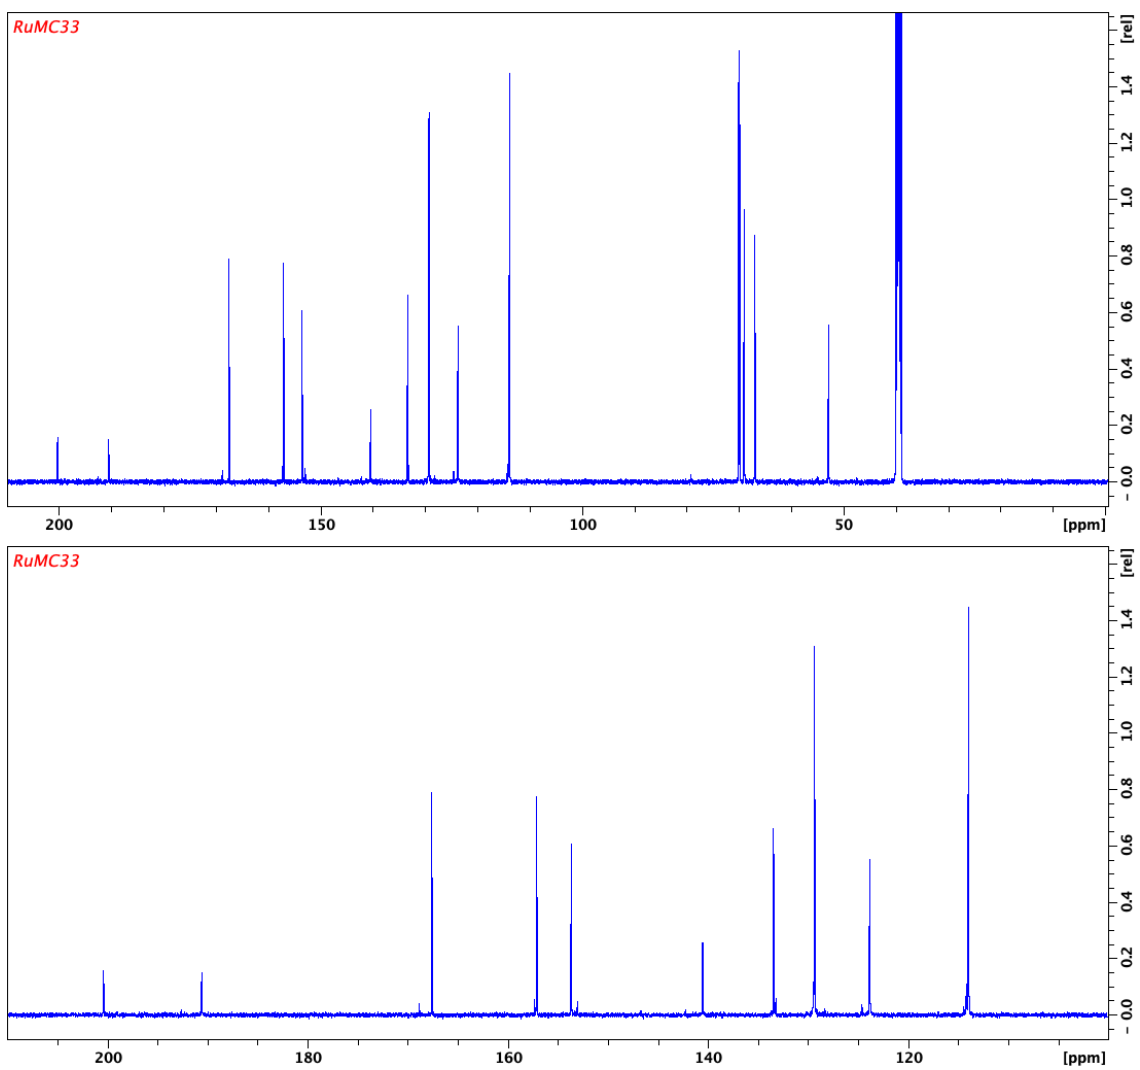

**Fig. S2.**  $^{13}\text{C}$ -NMR spectra of  $\text{Ru}(\text{MC33})(\text{CO})_2(\text{H}_2\text{O})$  (125 MHz,  $\text{DMSO-}d_6$ , r.t.).

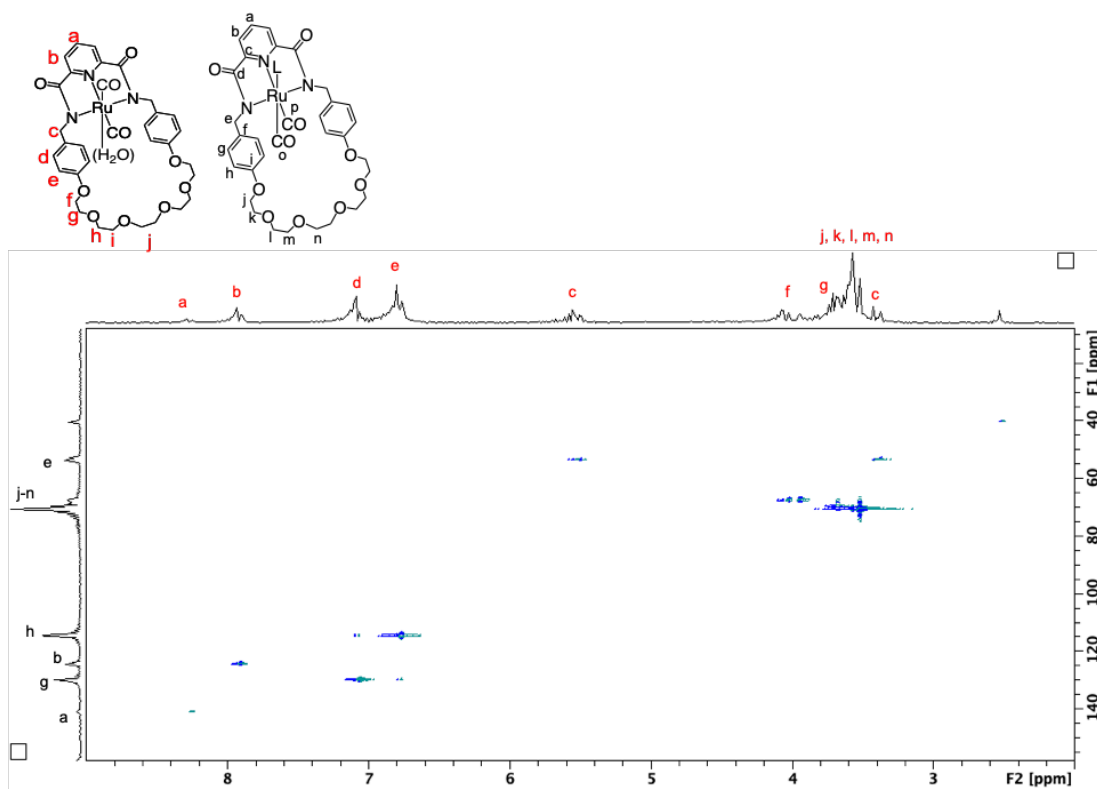

**Fig. S3.** HSQC spectrum of Ru(MC33)(CO)<sub>2</sub>(H<sub>2</sub>O) (DMSO-*d*<sub>6</sub>).

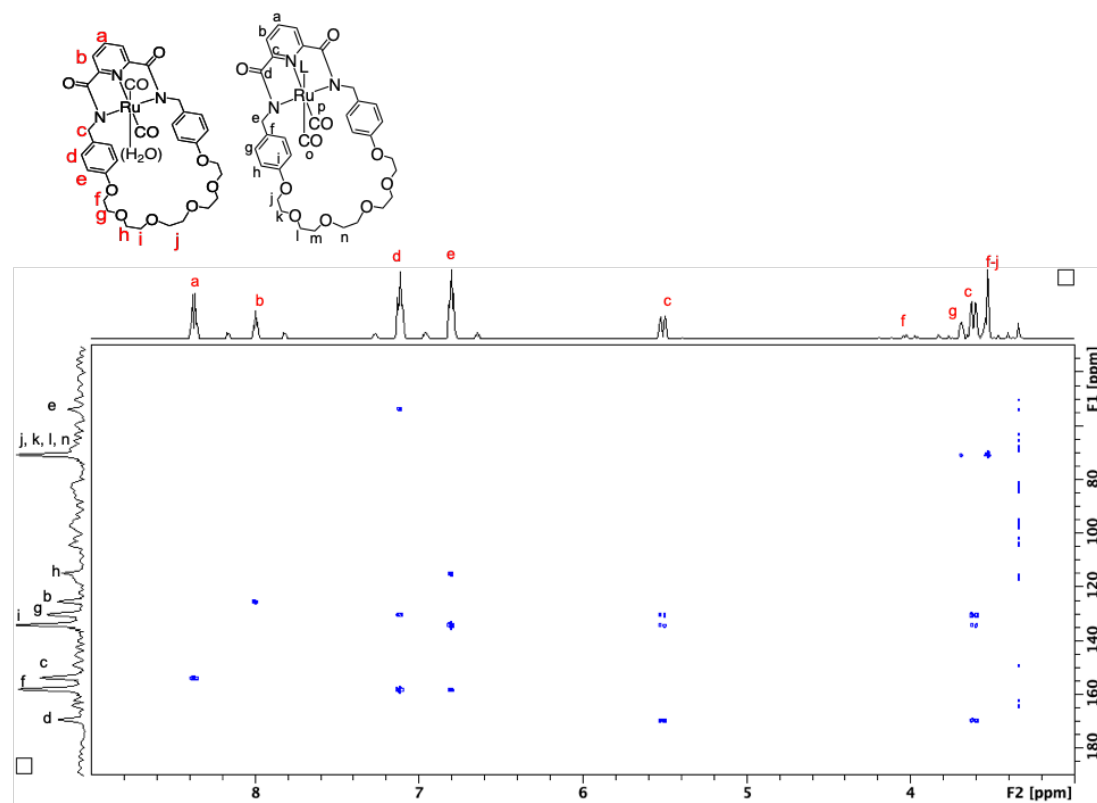

**Fig. S4.** HMBC spectrum of Ru(MC33)(CO)<sub>2</sub>(H<sub>2</sub>O) (DMSO-*d*<sub>6</sub>).

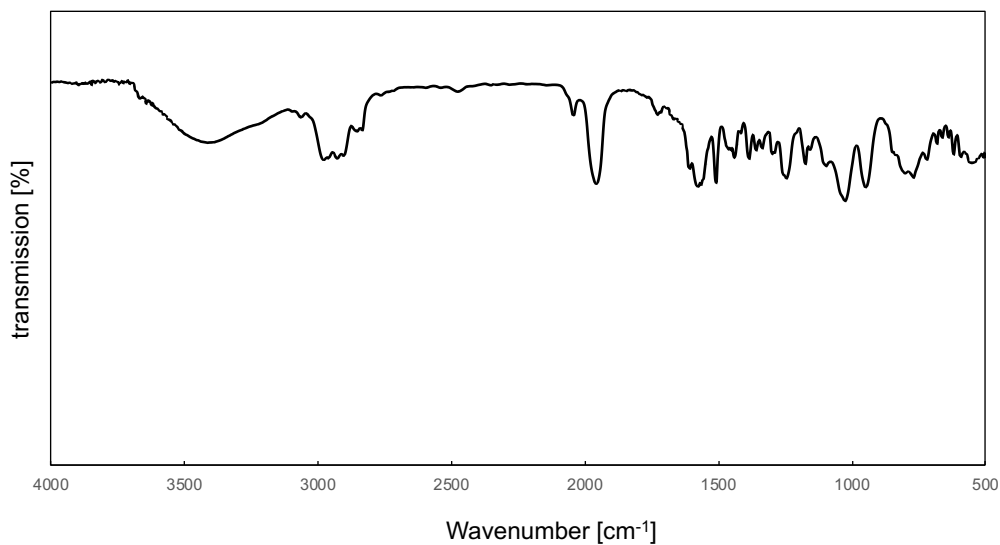

**Fig. S5.** FT-IR spectrum of Ru(MC33)(CO)<sub>2</sub>(H<sub>2</sub>O).

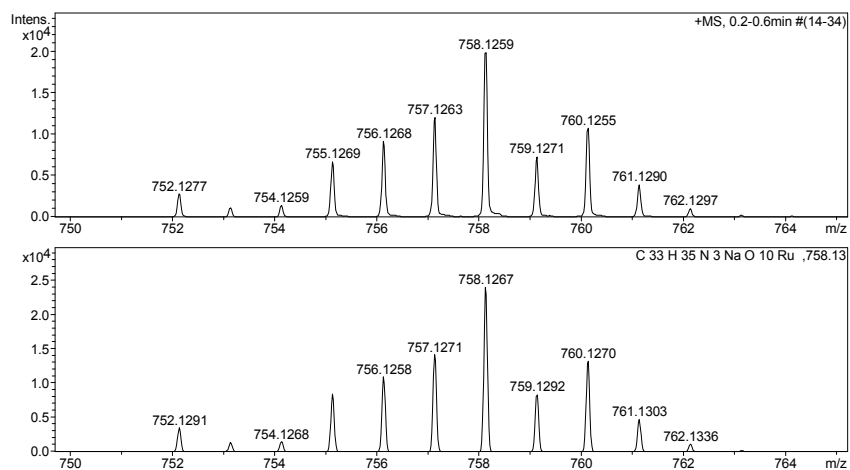

**Fig. S6.** ESI-TOF-MS spectrum of [Ru(MC33)(CO)<sub>2</sub>+Na]<sup>+</sup> (positive) (upper: found, bottom: calculated for C<sub>33</sub>H<sub>35</sub>N<sub>3</sub>NaO<sub>10</sub>Ru). Note that H<sub>2</sub>O was dissociated from complex during MS measurement.



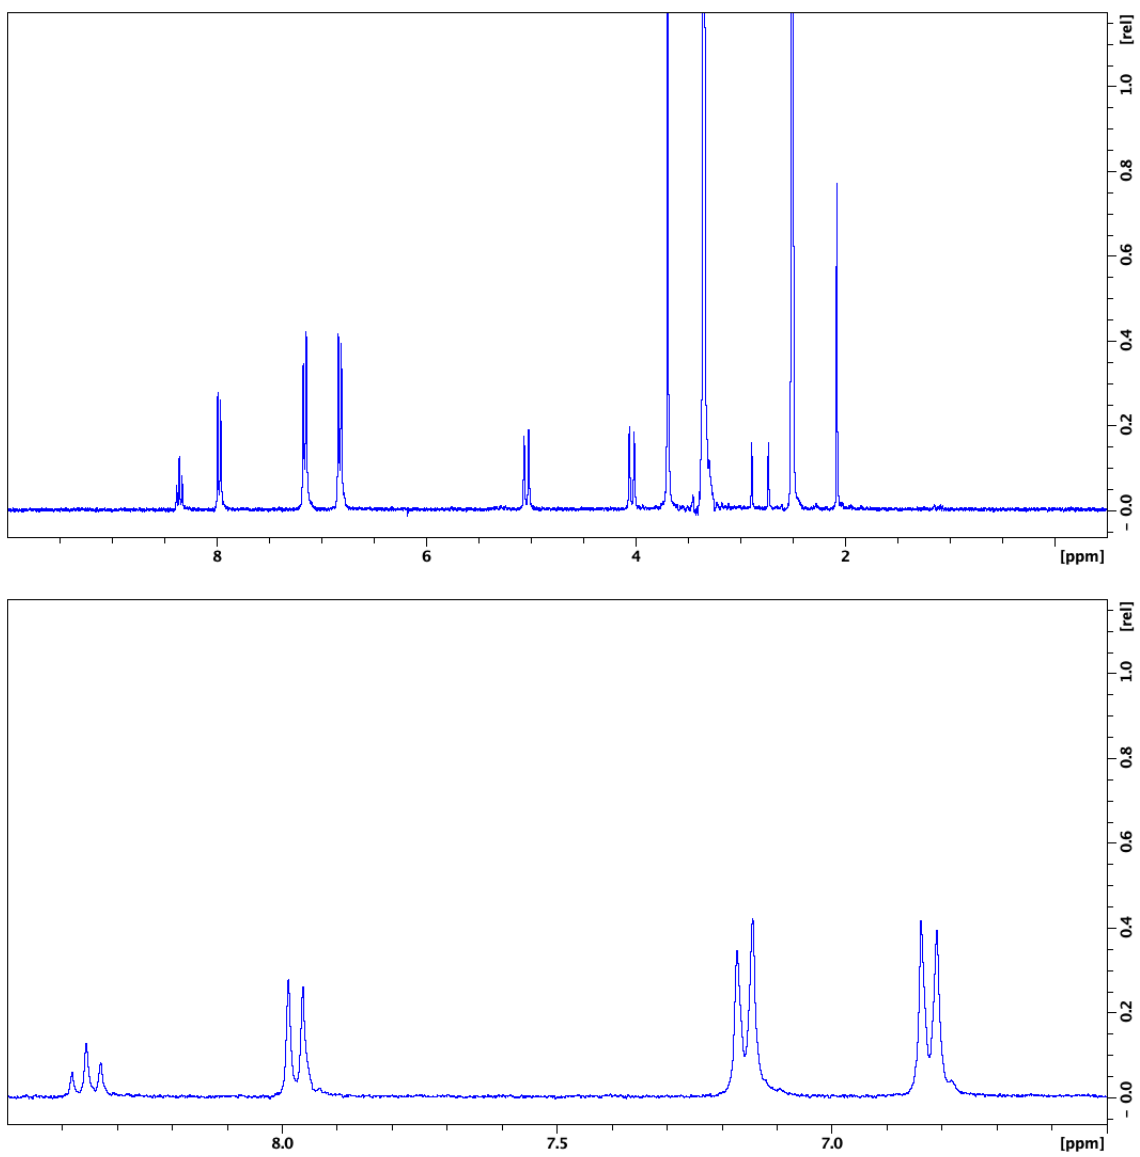

**Fig. S7.**  $^1\text{H-NMR}$  spectra of  $\text{Ru}(\text{AC})(\text{CO})_2(\text{H}_2\text{O})$  (500 MHz,  $\text{DMSO-}d_6$ , r.t.).

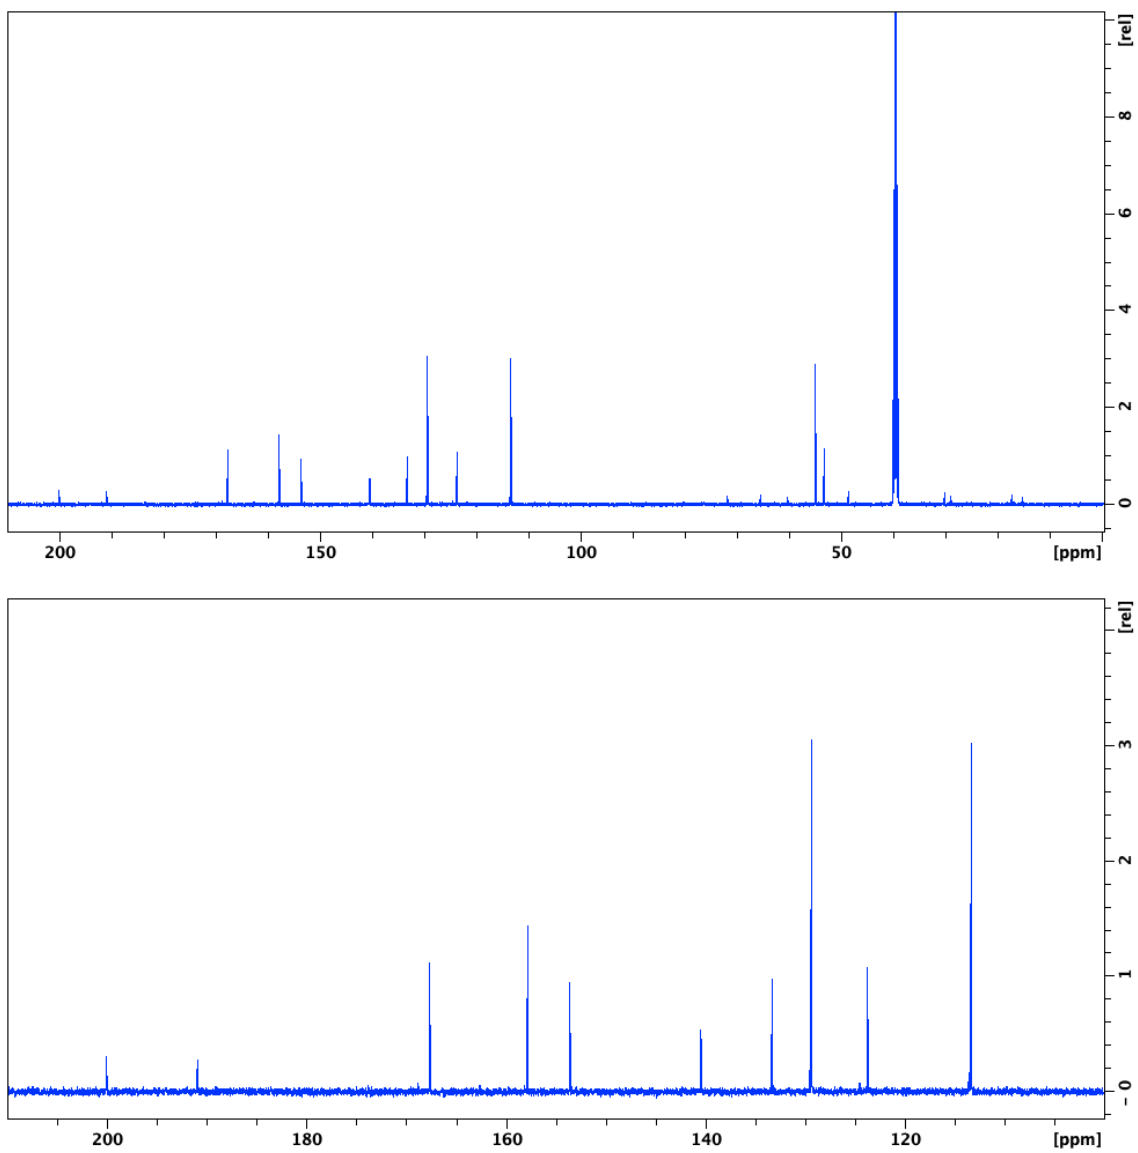

**Fig. S8.**  $^{13}\text{C}$ -NMR spectra of  $\text{Ru}(\text{AC})(\text{CO})_2(\text{H}_2\text{O})$  (125 MHz,  $\text{DMSO-}d_6$ , r.t.).

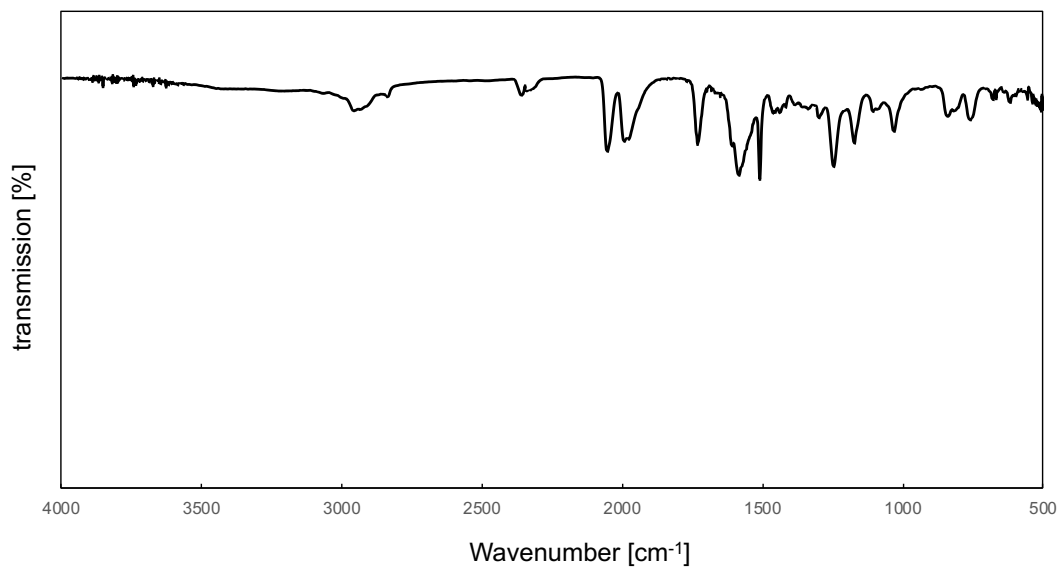

**Fig. S9.** FT-IR spectrum of Ru(AC)(CO)<sub>2</sub>(H<sub>2</sub>O).

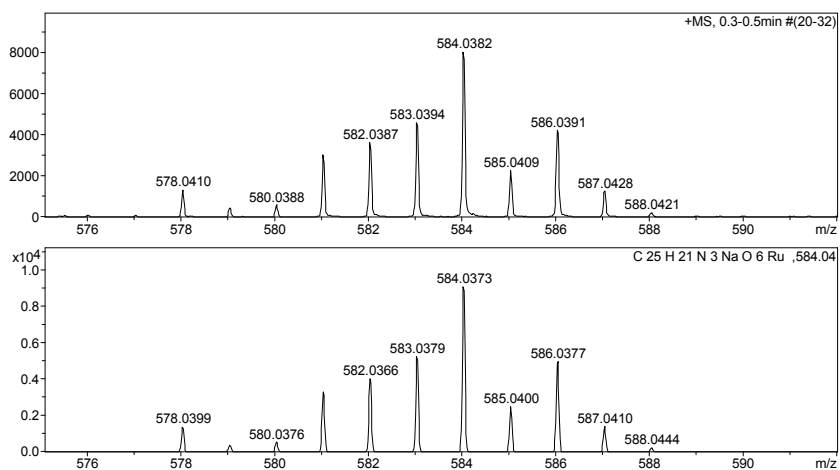

**Fig. S10.** ESI-TOF-MS spectrum of [Ru(AC)(CO)<sub>2</sub>+Na]<sup>+</sup> (positive) (upper: found, bottom: calculated for C<sub>25</sub>H<sub>21</sub>N<sub>3</sub>NaO<sub>6</sub>Ru). Note that H<sub>2</sub>O was dissociated from complex during MS measurement.

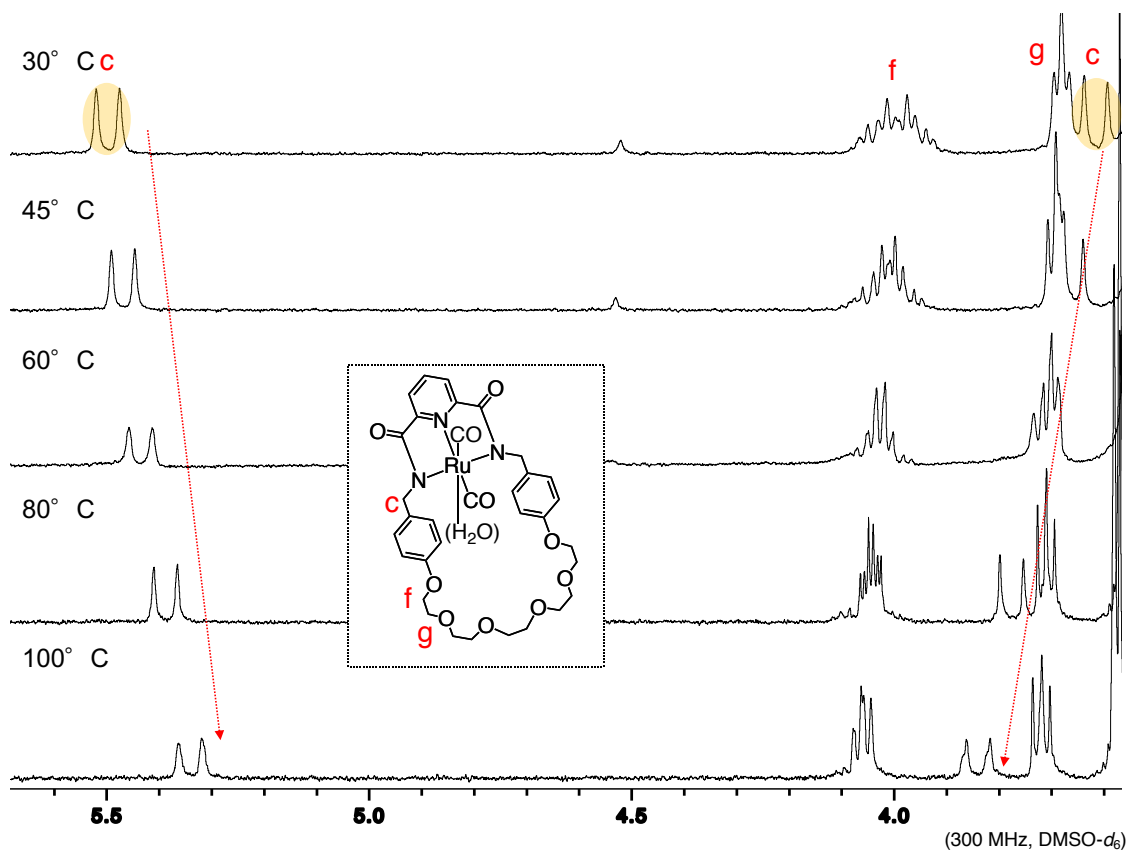

**Fig. S11.** VT-NMR spectra of Ru(MC33)(CO)<sub>2</sub>(H<sub>2</sub>O) (300 MHz, DMSO-*d*<sub>6</sub>).

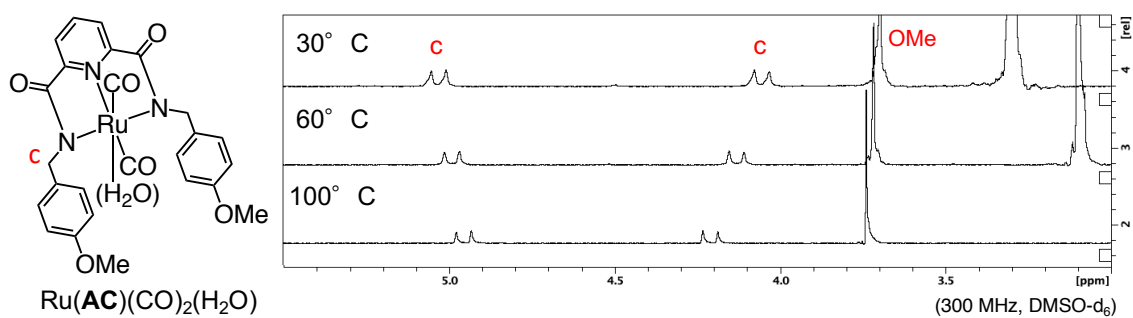

**Fig. S12.** VT-NMR spectra of Ru(AC)(CO)<sub>2</sub>(H<sub>2</sub>O) (300 MHz, DMSO-*d*<sub>6</sub>).

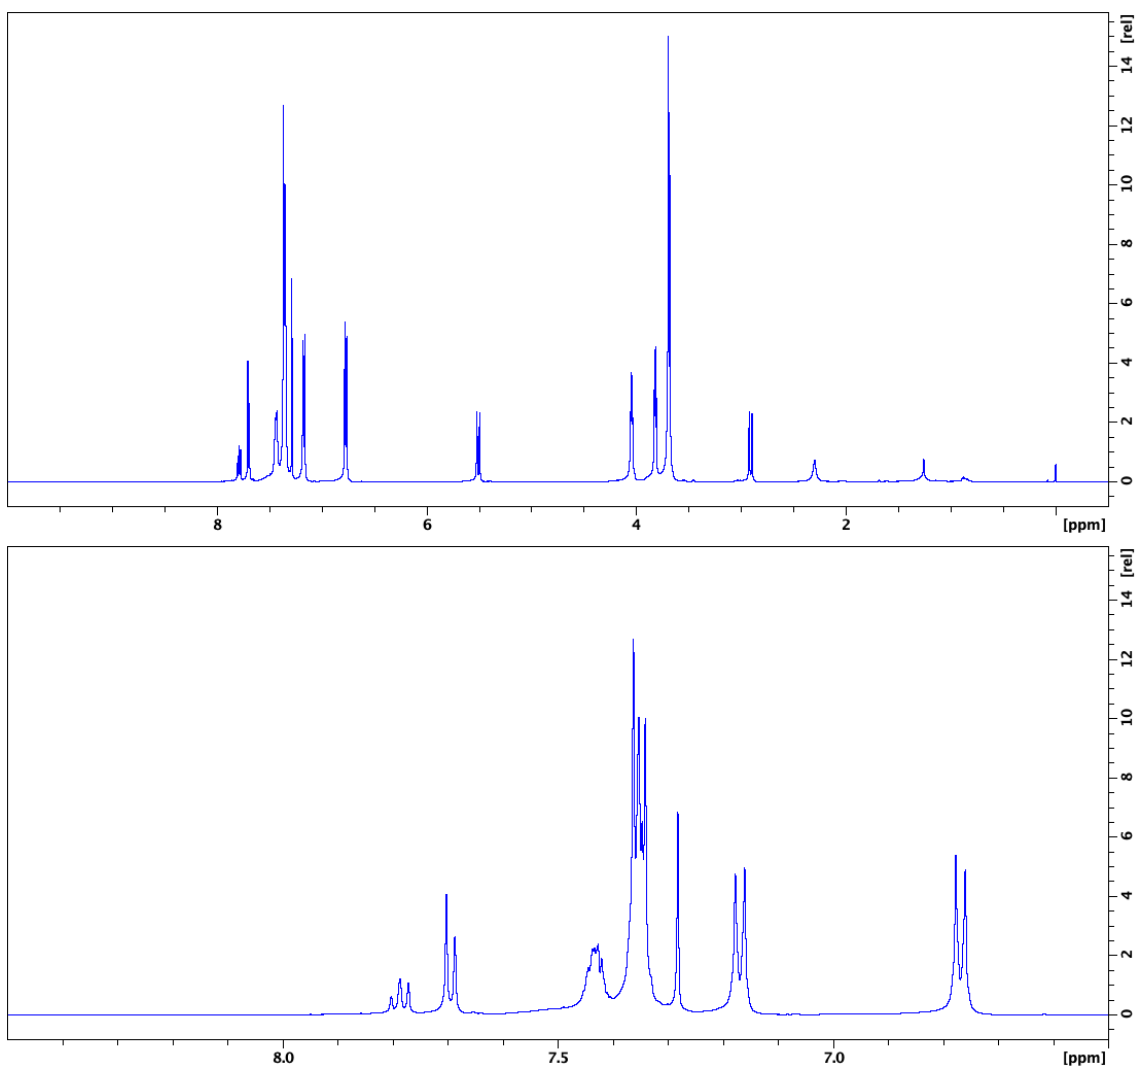

**Fig. S13.**  $^1\text{H-NMR}$  spectra of  $\text{Ru}(\text{MC33})(\text{CO})_2(\text{P1})$  (500 MHz,  $\text{CDCl}_3$ , r.t.).

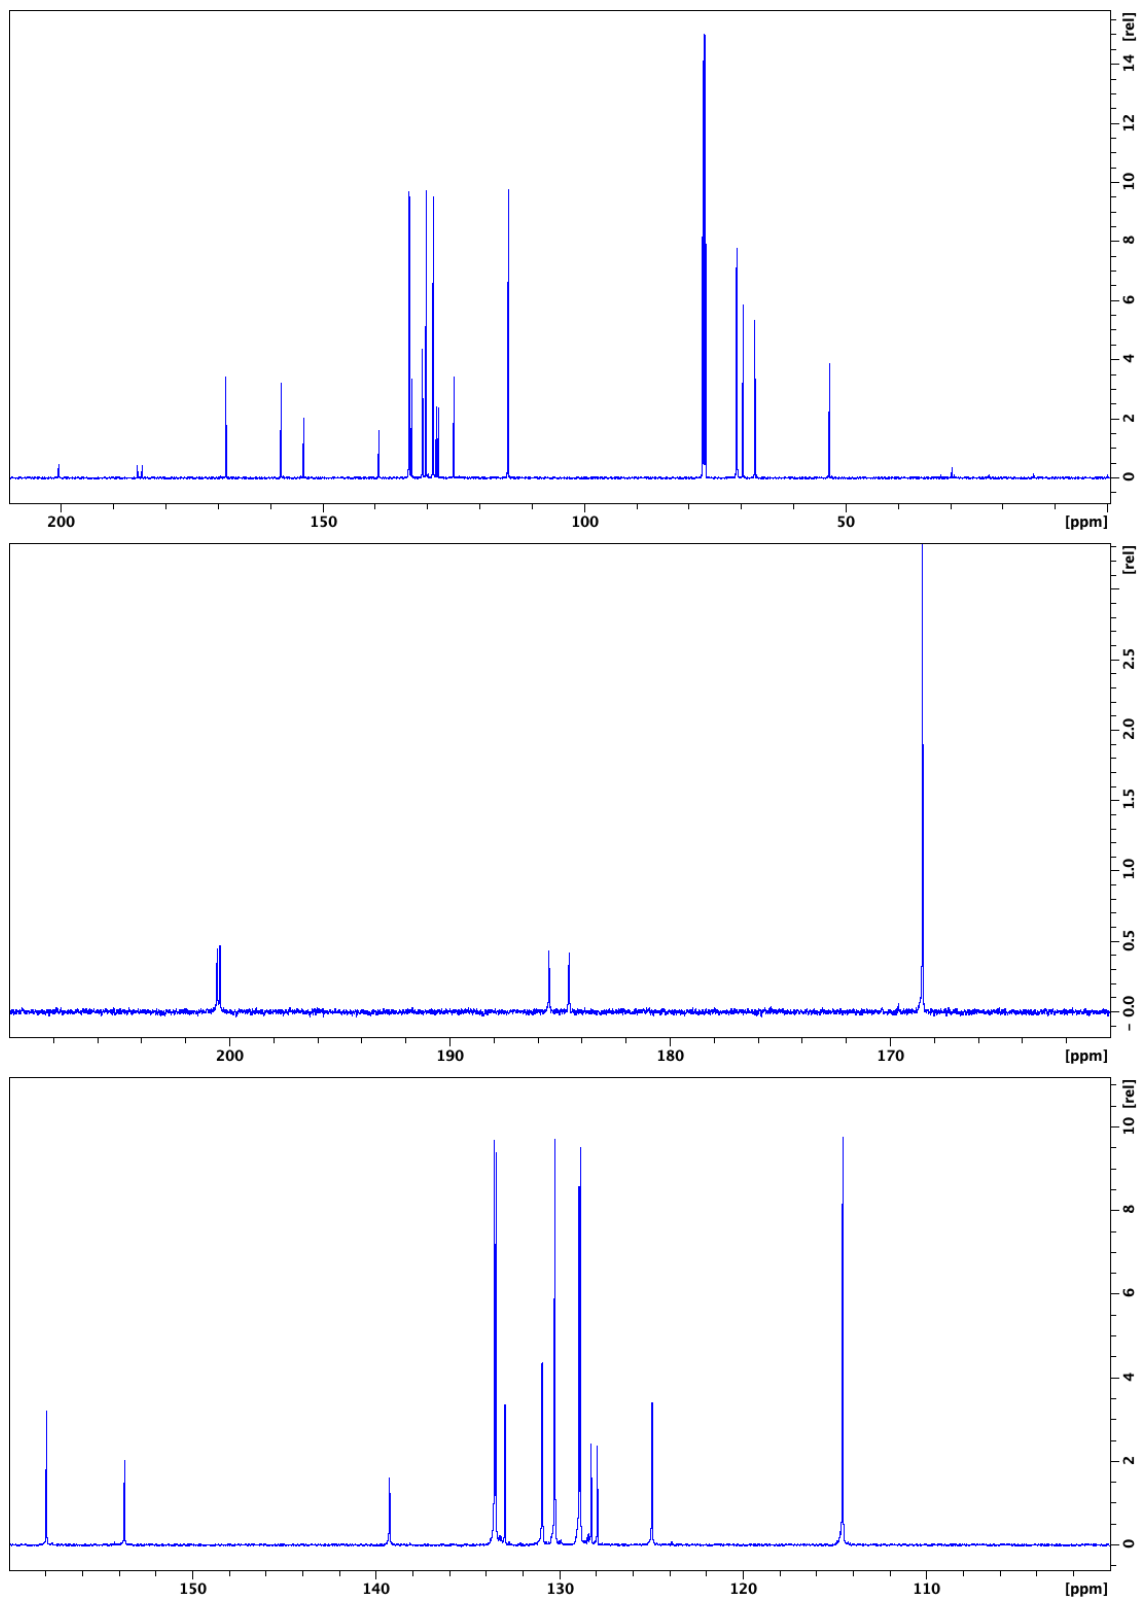

**Fig. S14.**  $^{13}\text{C}$ -NMR spectra of  $\text{Ru}(\text{Ru33})(\text{CO})_2(\text{P1})$  (125 MHz,  $\text{CDCl}_3$ , r.t.).

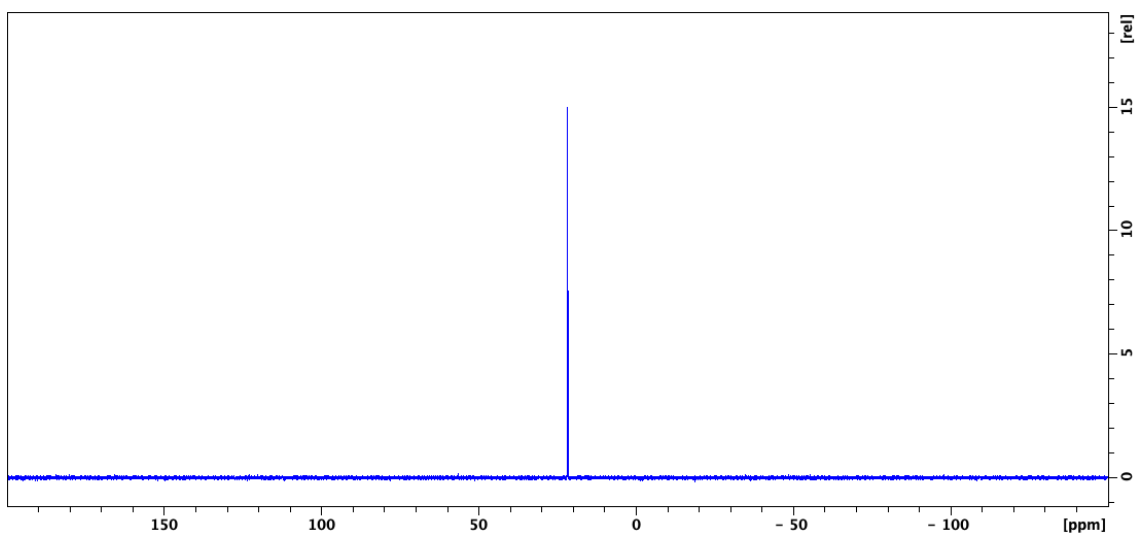

**Fig. S15.**  $^{31}\text{P}$ -NMR spectrum of  $\text{Ru}(\text{MC33})(\text{CO})_2(\text{P1})$  (202 MHz,  $\text{DMSO}-d_6$ , r.t.).

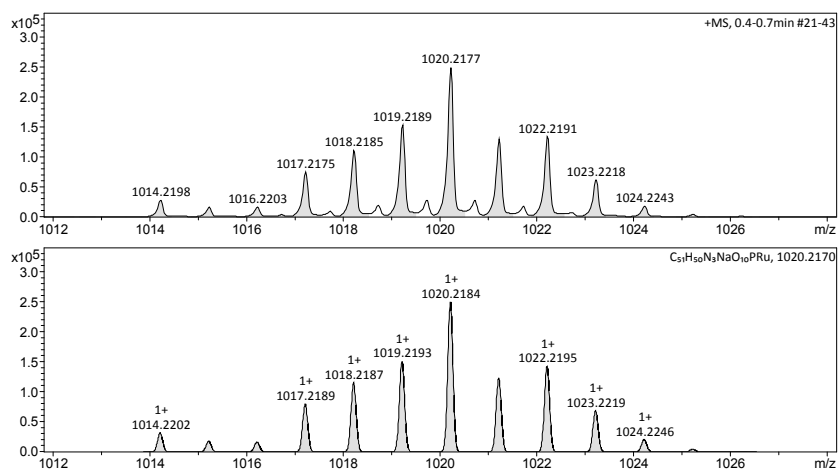

**Fig. S16.** ESI-TOF-MS spectrum of  $[\text{Ru}(\text{MC33})(\text{CO})_2(\text{P1})+\text{Na}]^+$  positive) (upper: found, bottom: calculated for  $\text{C}_{51}\text{H}_{50}\text{N}_3\text{NaO}_{10}\text{PRu}$ ).

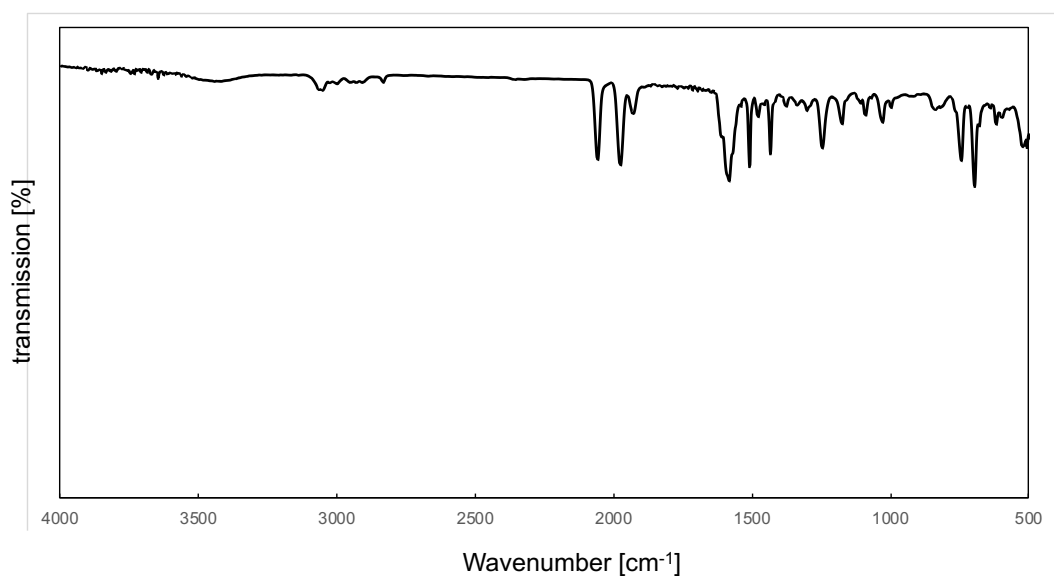

**Fig. S17.** FT-IR spectrum of Ru(MC33)(CO)<sub>2</sub>(P1).

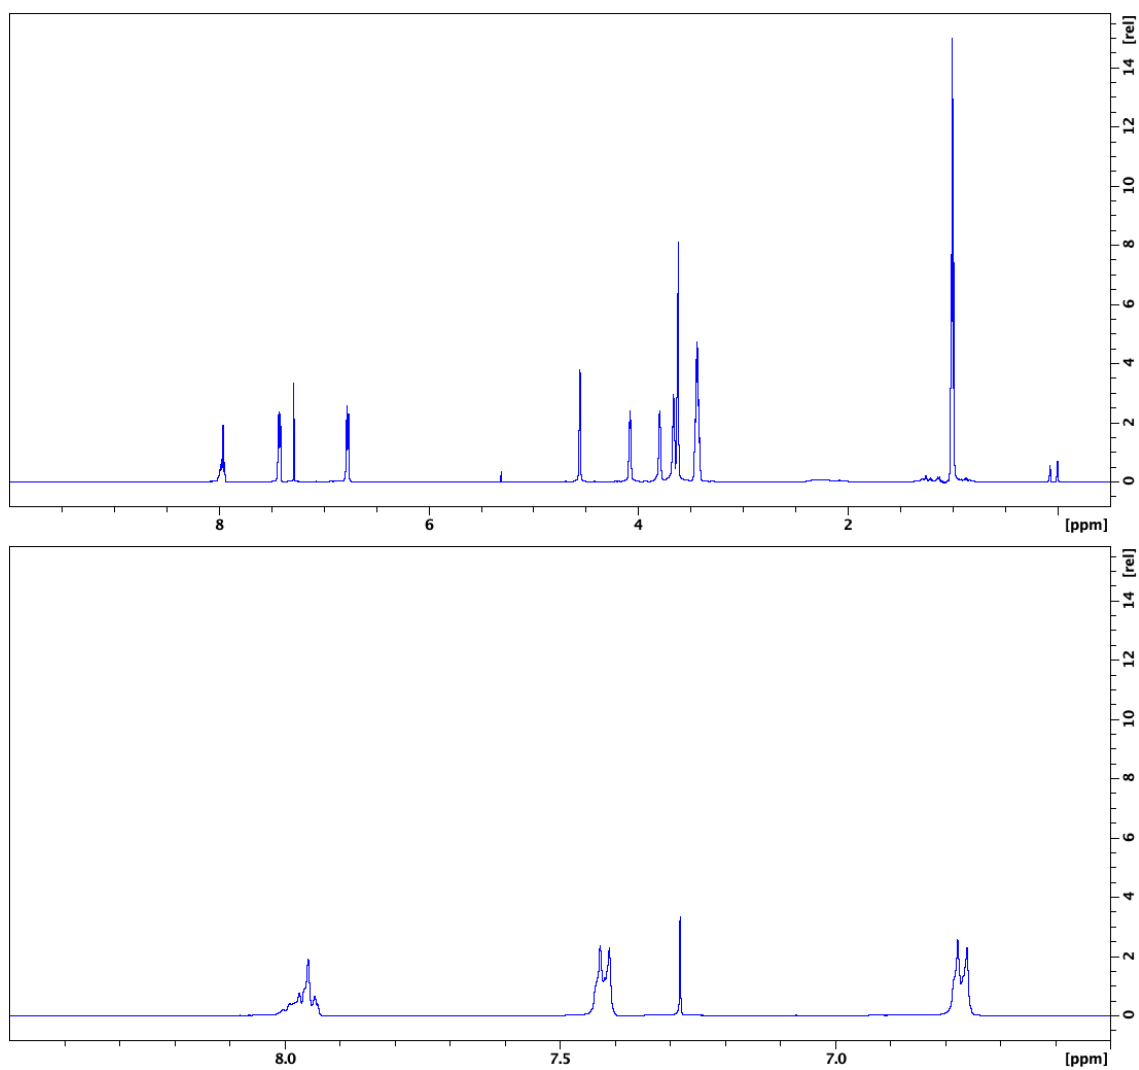

**Fig. S18.** <sup>1</sup>H-NMR spectra of Ru(MC33)(CO)(P2)<sub>2</sub> (500 MHz, CDCl<sub>3</sub>, r.t.).



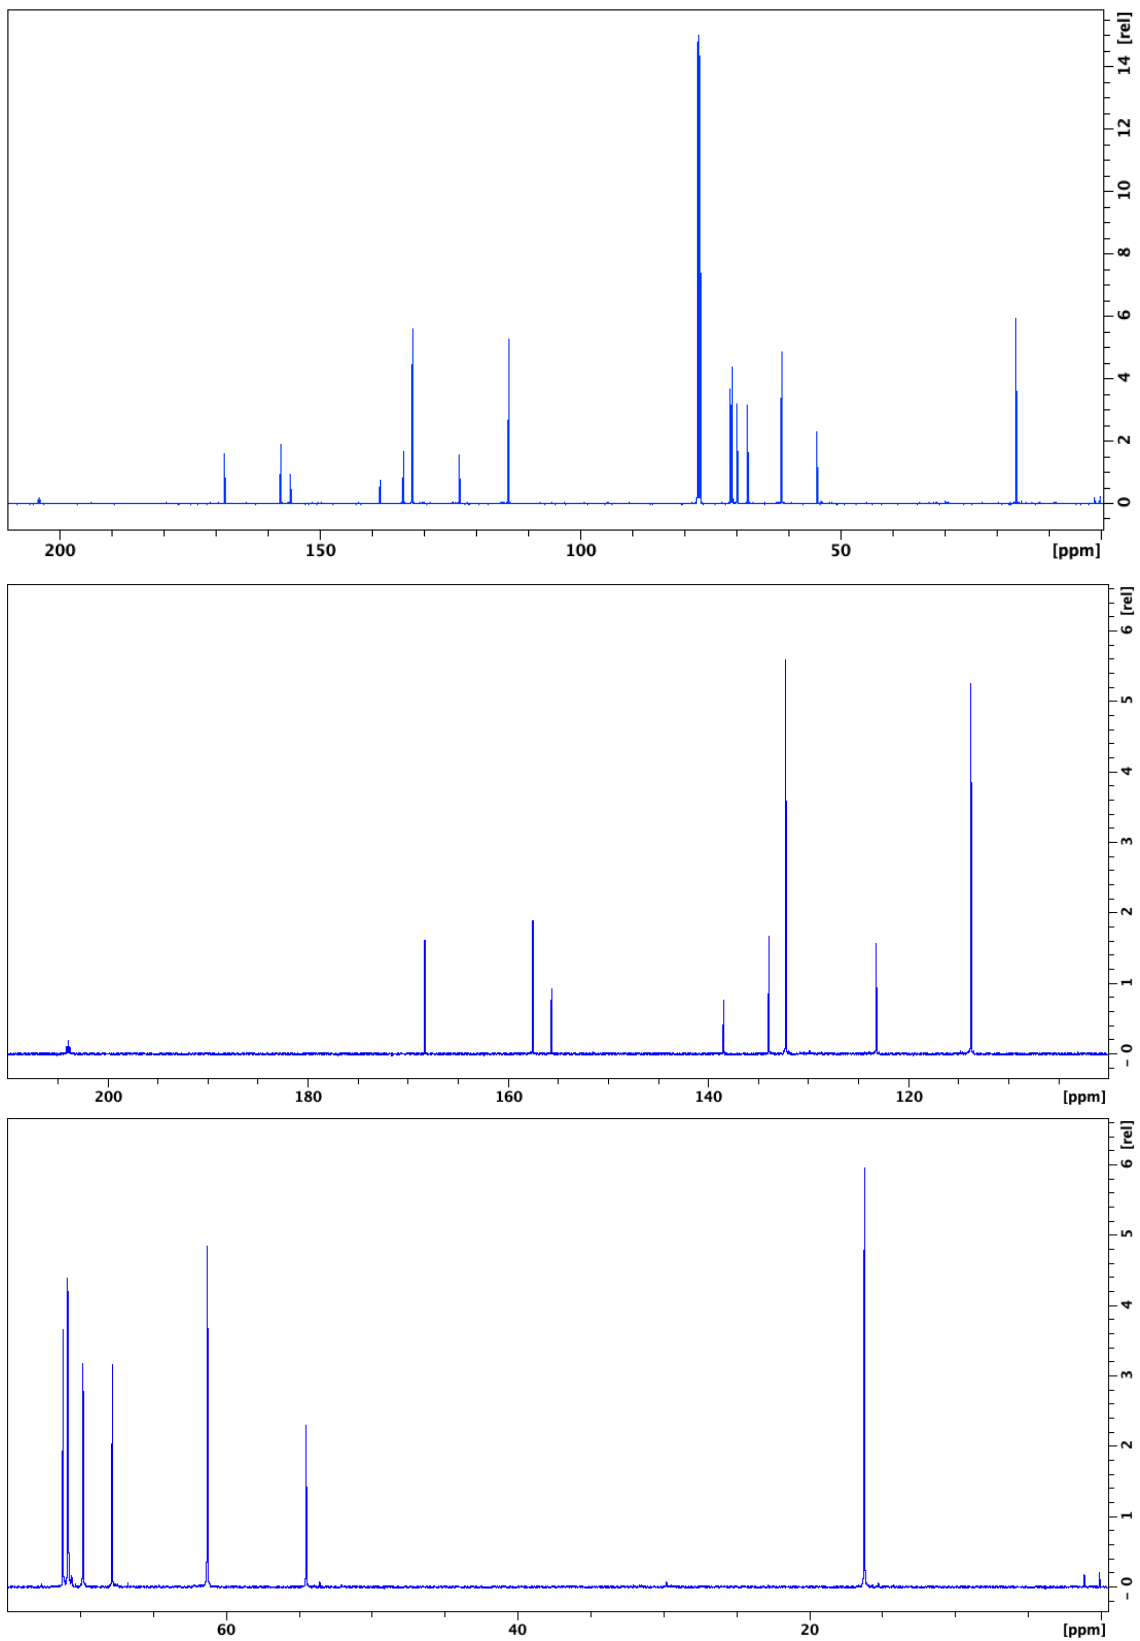

**Fig. S19.**  $^{13}\text{C}$ -NMR spectra of  $\text{Ru}(\text{MC33})(\text{CO})(\text{P2})_2$  (125 MHz,  $\text{CDCl}_3$ , r.t.).

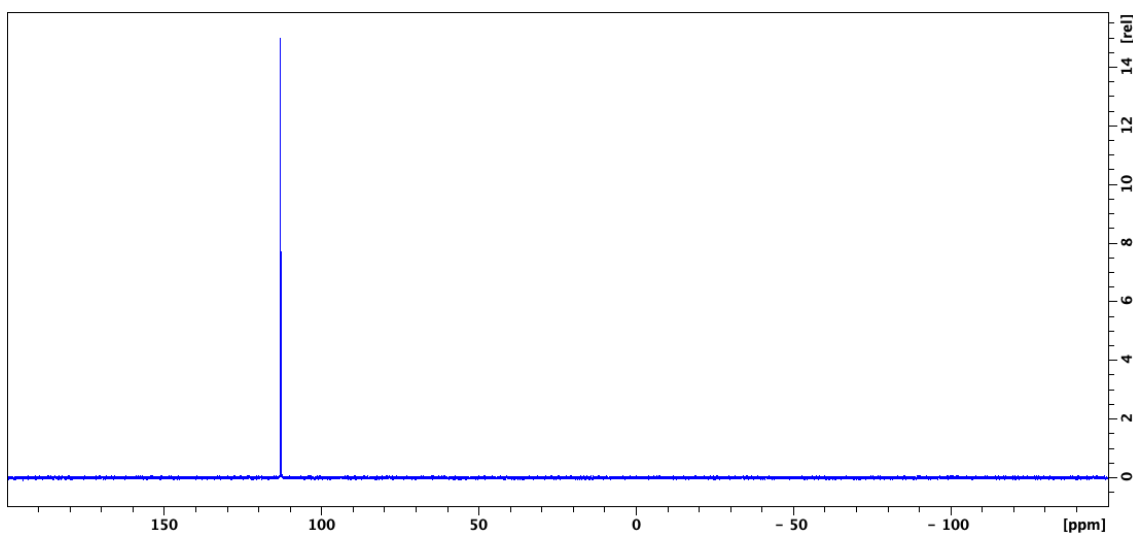

**Fig. S20.**  $^{31}\text{P}$ -NMR spectrum of  $\text{Ru}(\text{MC33})(\text{CO})(\text{P2})_2$  (202 MHz,  $\text{CDCl}_3$ , r.t.).

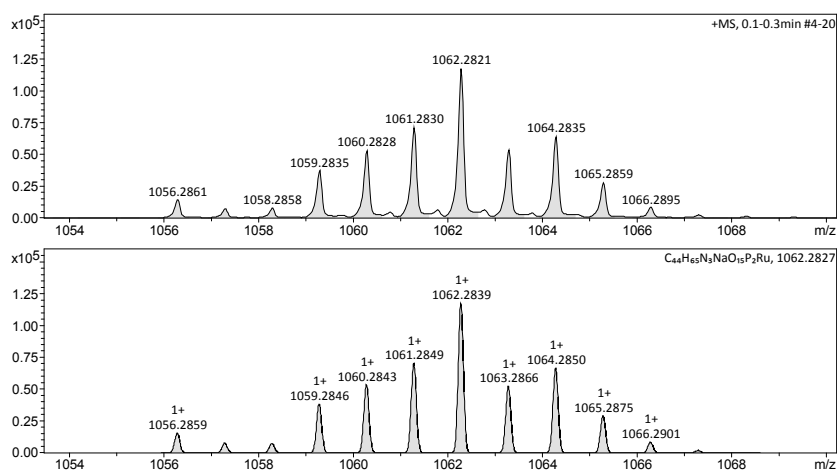

**Fig. S21.** ESI-TOF-MS spectrum of  $[\text{Ru}(\text{MC33})(\text{CO})(\text{P2})_2+\text{Na}]^+$  (positive) of (upper: found, bottom: calculated for  $\text{C}_{44}\text{H}_{65}\text{N}_3\text{NaO}_{15}\text{P}_2\text{Ru}$ )

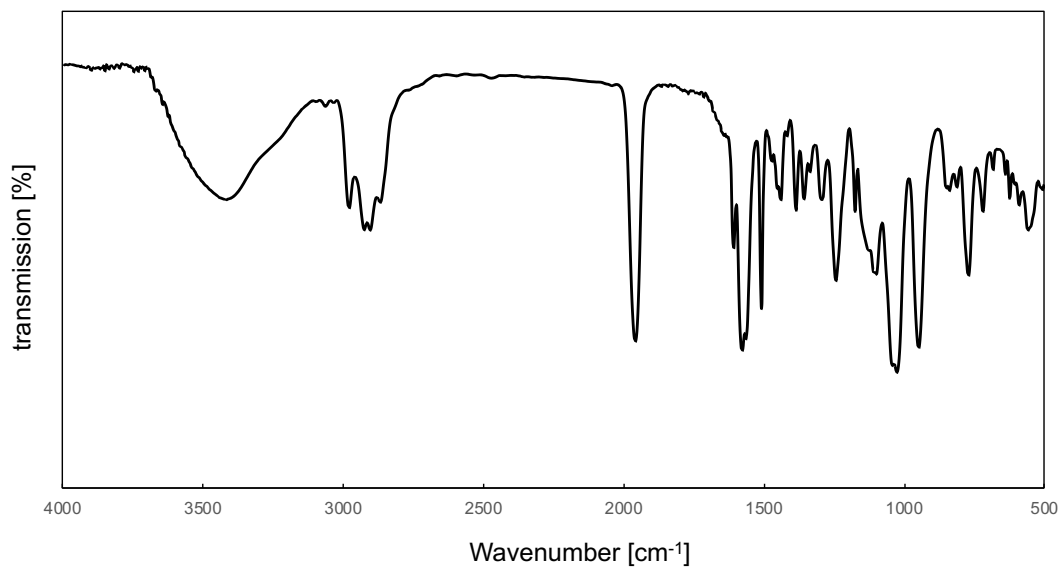

**Fig. S22.** FT-IR spectrum of Ru(MC33)(CO)(P2)<sub>2</sub>.

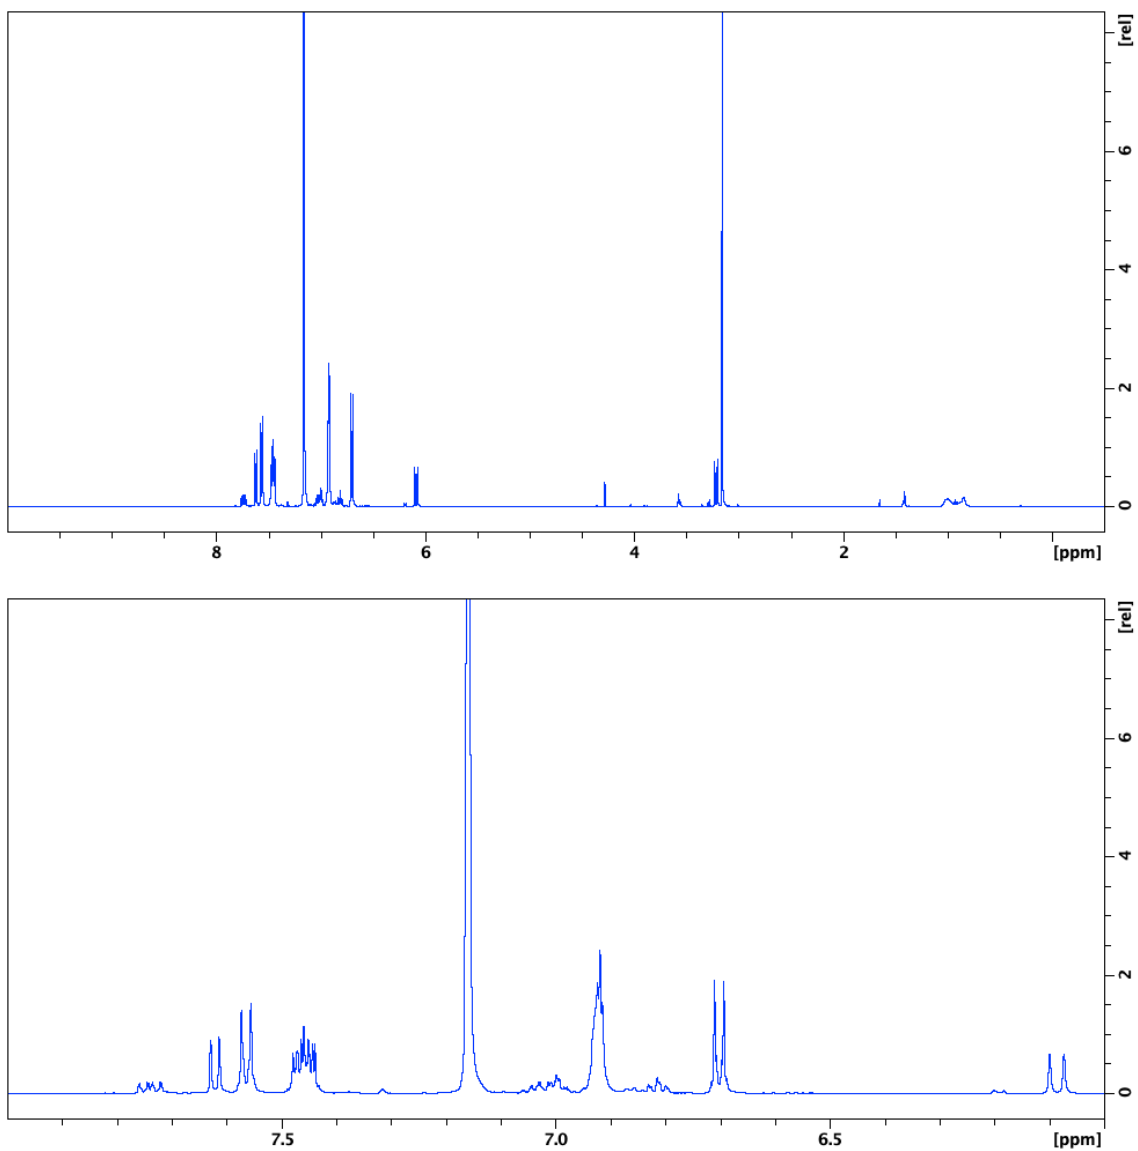

**Fig. S23.** <sup>1</sup>H-NMR spectra of Ru(AC)(CO)<sub>2</sub>(P1) (not isolated, crude product) (500 MHz, C<sub>6</sub>D<sub>6</sub>, r.t.).

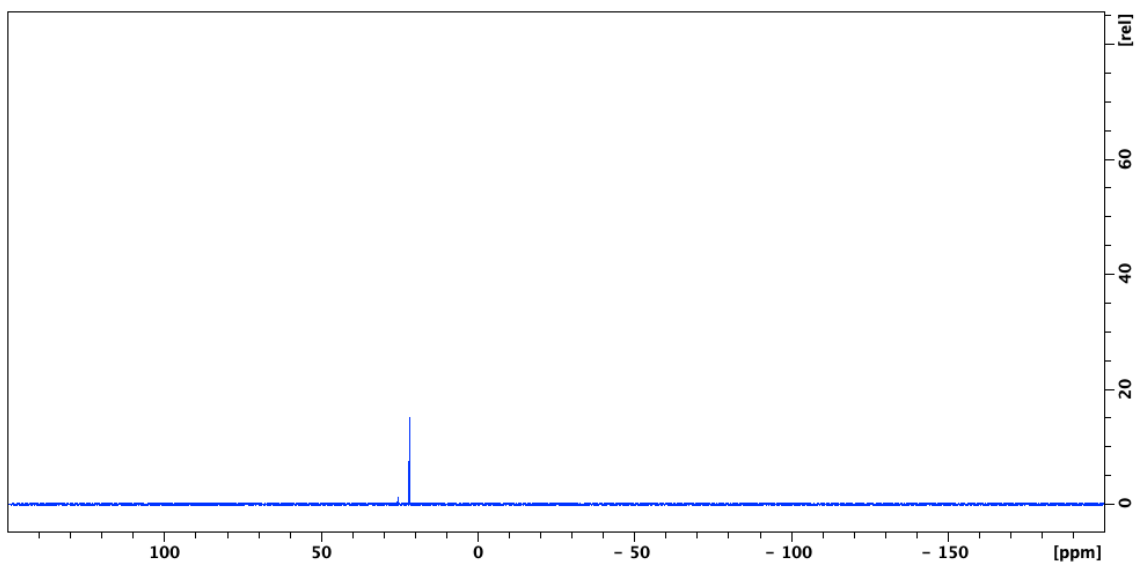

**Fig. S24.**  $^{31}\text{P}$ -NMR spectrum of  $\text{Ru}(\text{AC})(\text{CO})_2(\text{P1})$  (not isolated, crude product) (202 MHz,  $\text{C}_6\text{D}_6$ , r.t.).

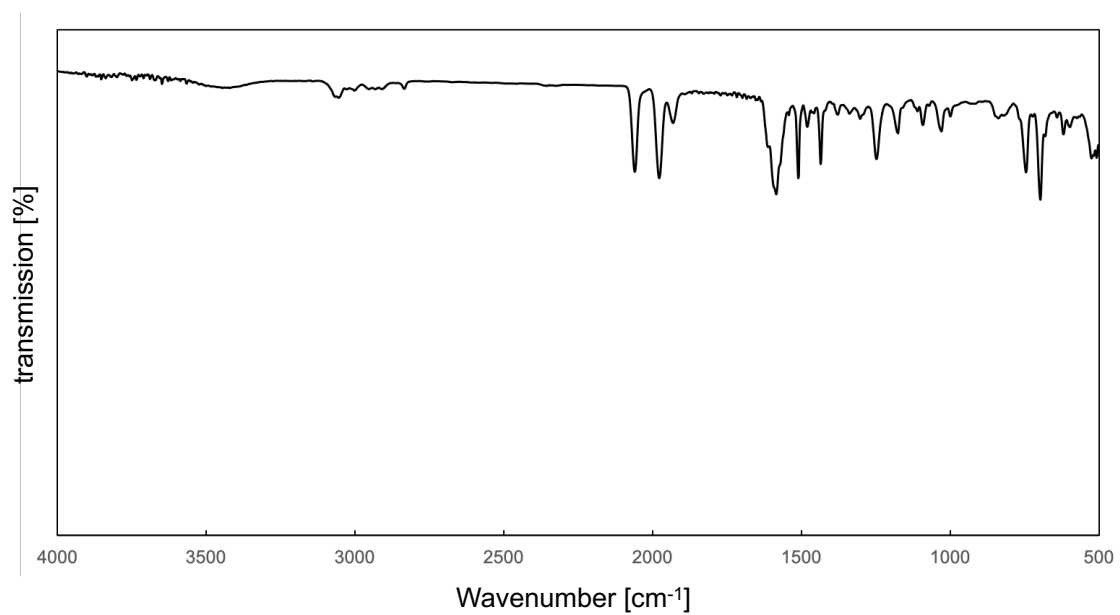

**Fig. S25.** FT-IR spectrum of  $\text{Ru}(\text{AC})(\text{CO})_2(\text{P1})$  (not isolated, crude product).

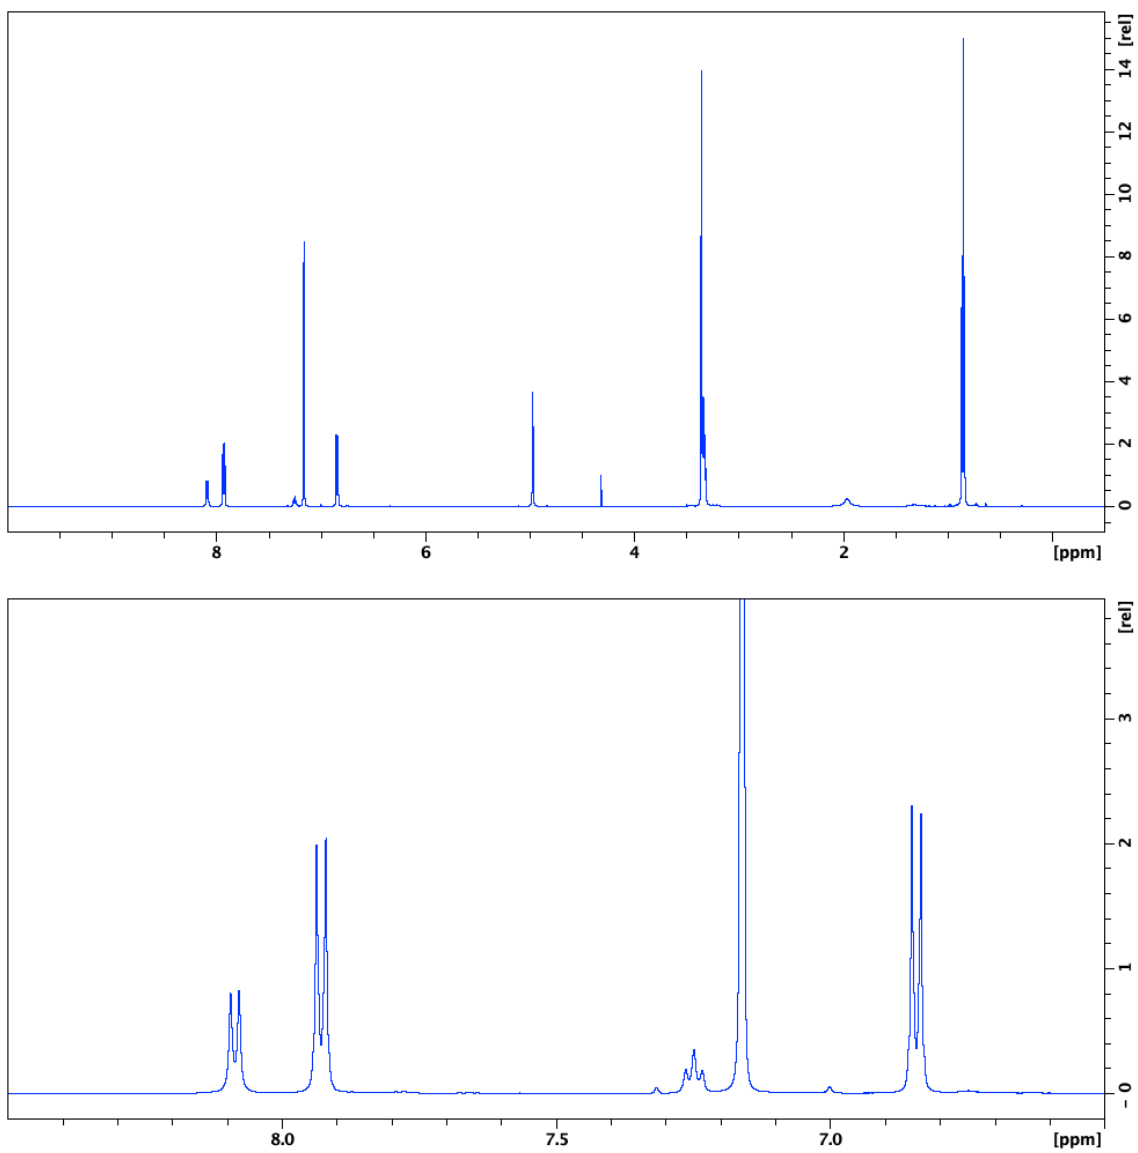

**Fig. S26.**  $^1\text{H-NMR}$  spectra of  $\text{Ru}(\text{AC})(\text{CO})(\text{P2})_2$  (500 MHz,  $\text{C}_6\text{D}_6$ , r.t.).

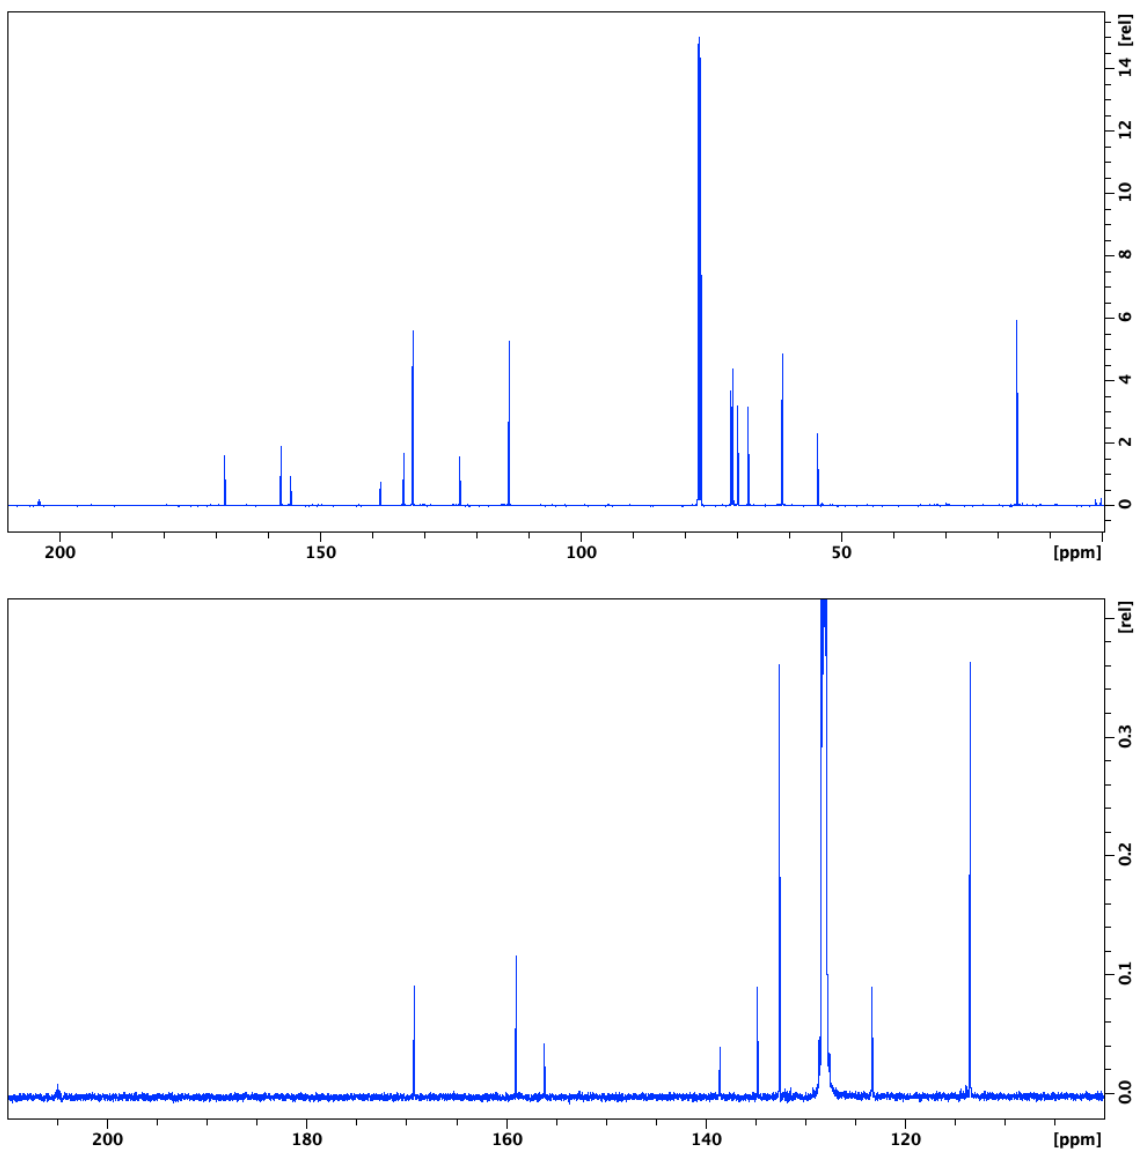

**Fig. S27.**  $^{13}\text{C}$ -NMR spectra of  $\text{Ru}(\text{AC})(\text{CO})(\text{P2})_2$  (125 MHz,  $\text{C}_6\text{D}_6$ , r.t.).

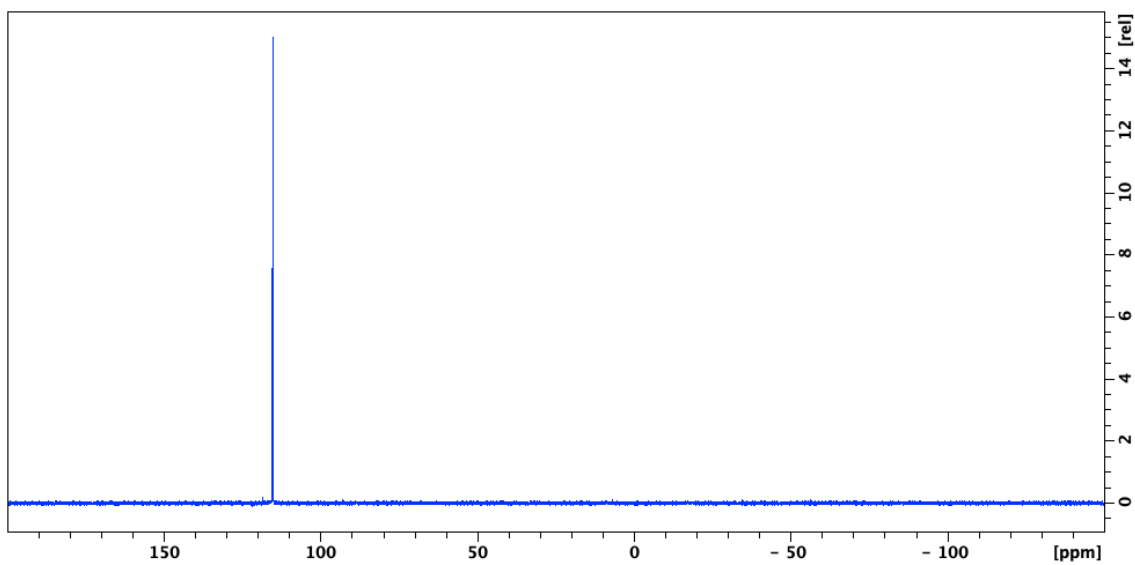

**Fig. S28.**  $^{31}\text{P}$ -NMR spectrum of  $\text{Ru}(\text{AC})(\text{CO})(\text{P2})_2$  (202 MHz,  $\text{C}_6\text{D}_6$ , r.t.).

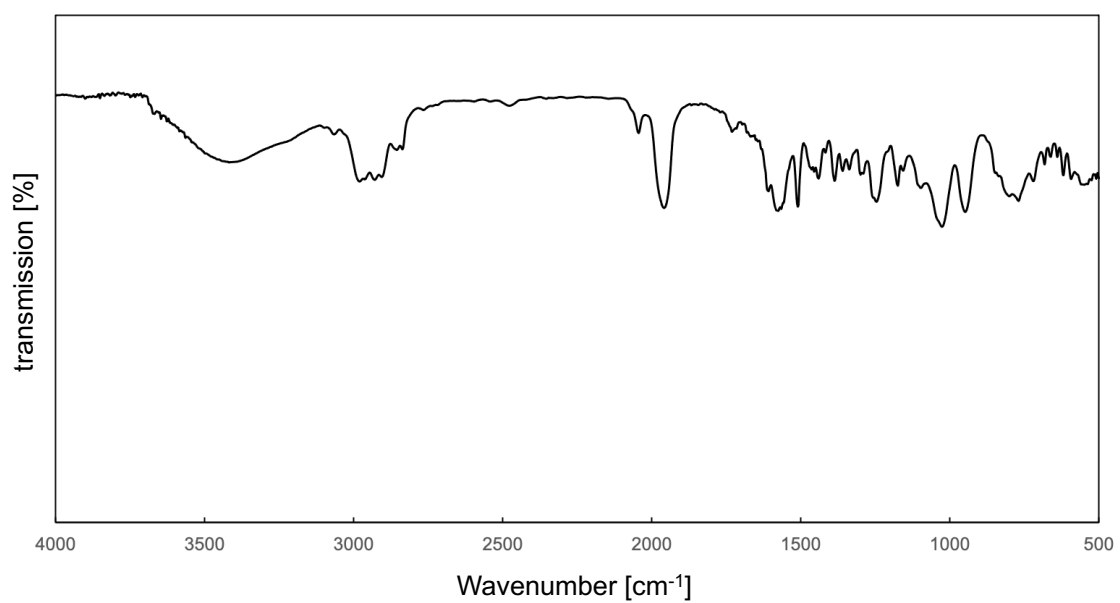

**Fig. S29.** FT-IR spectrum of  $\text{Ru}(\text{AC})(\text{CO})(\text{P2})_2$ .



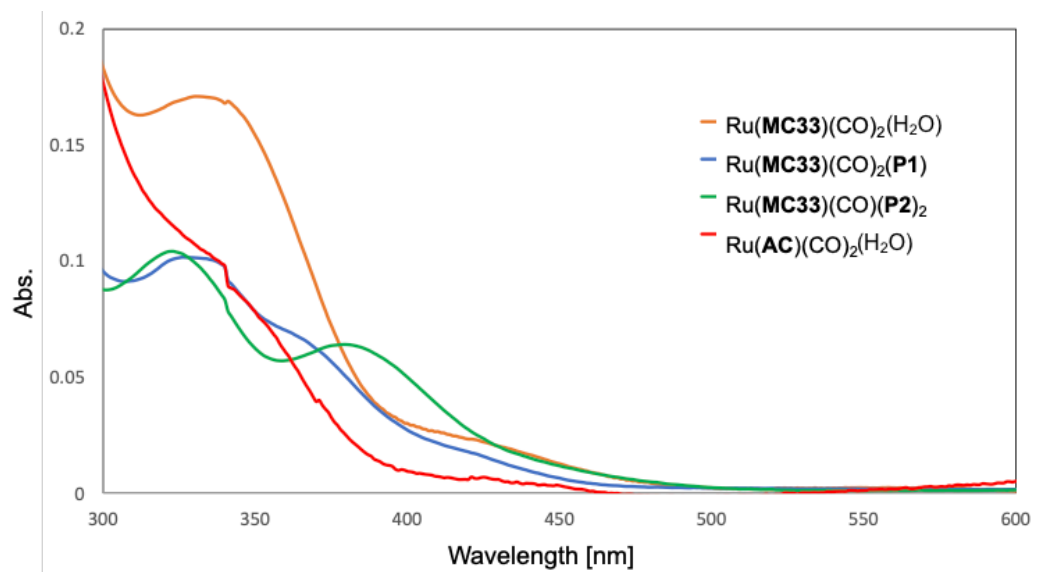

**Fig. S30.** UV-vis spectra of Ru complexes in DMSO.

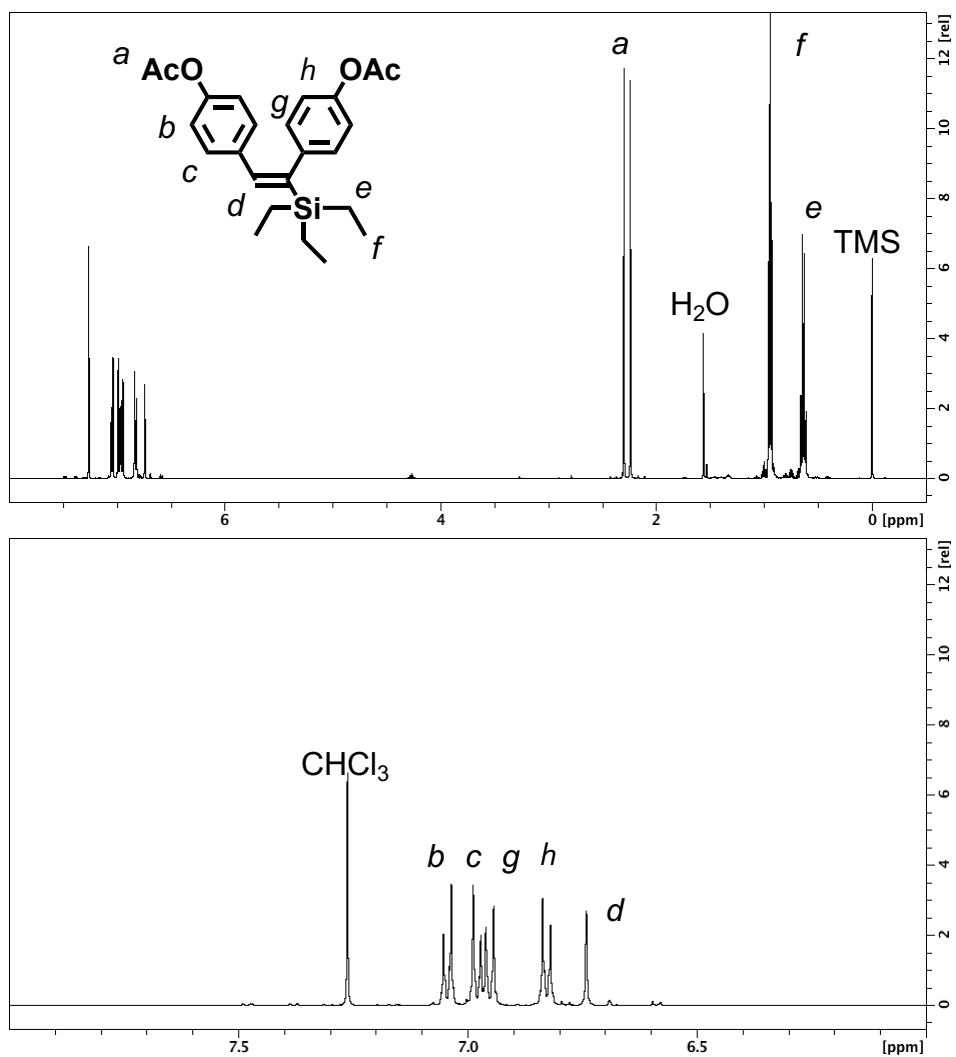

**Fig. S31.**  $^1\text{H-NMR}$  spectrum of *cis*-vinylsilane **2** (500 MHz,  $\text{CDCl}_3$ , r.t.).

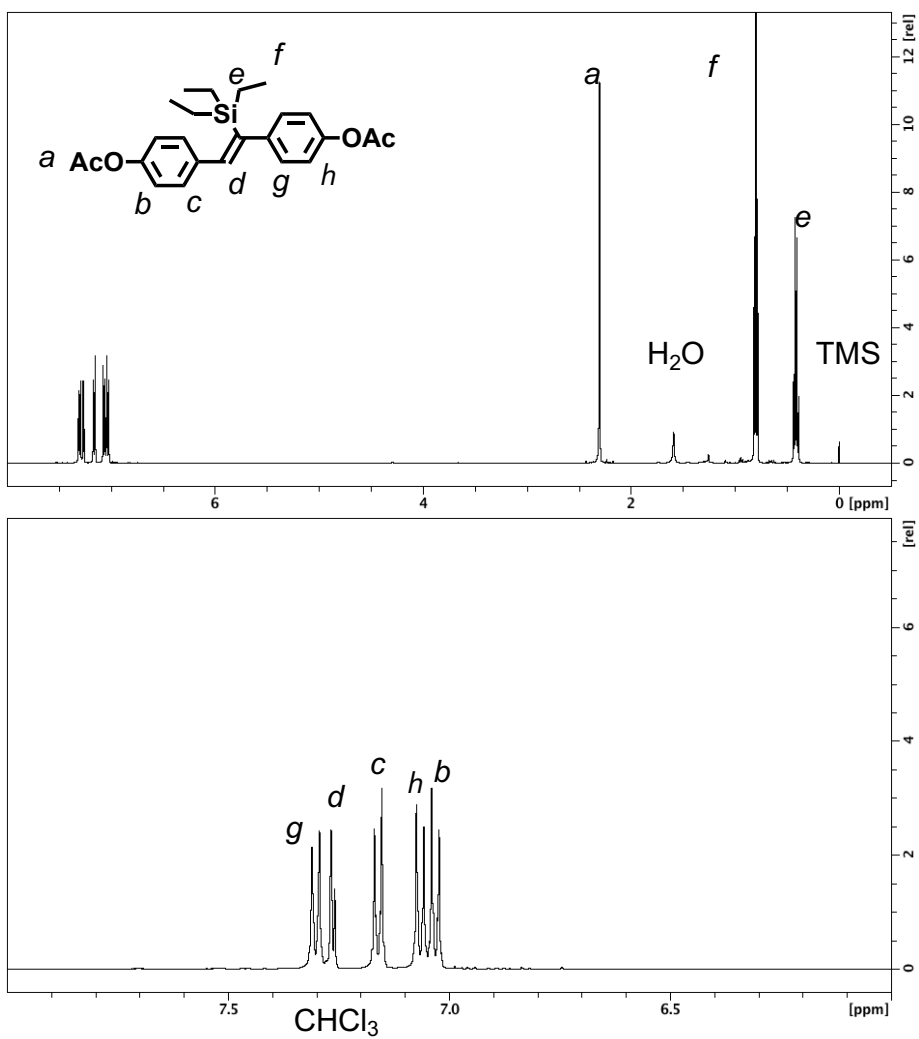

**Fig. S32.**  $^1\text{H-NMR}$  spectrum of *trans*-vinylsilane **3** (500 MHz,  $\text{CDCl}_3$ , r.t.).

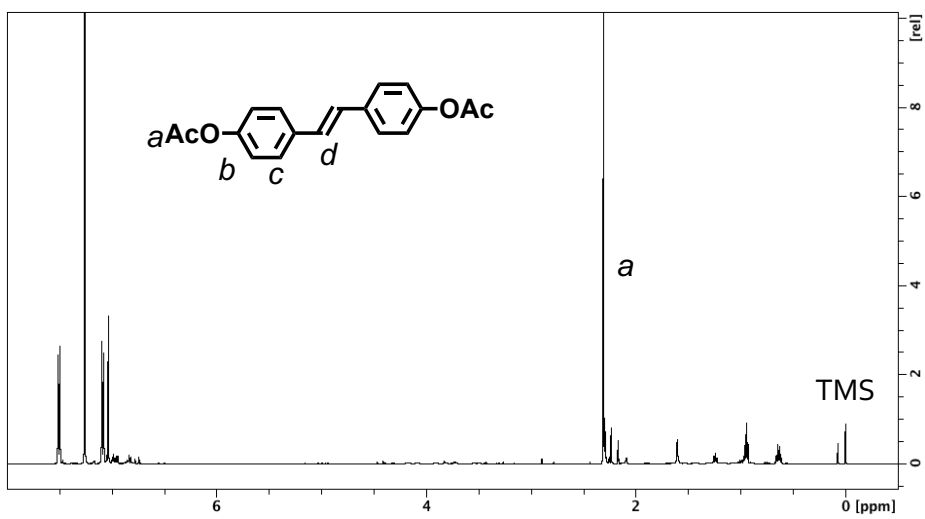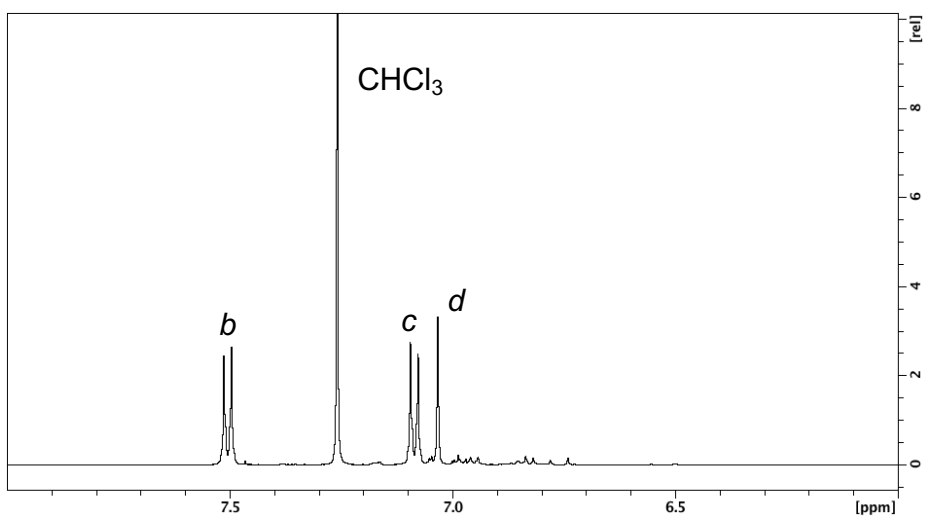

**Fig. S33.** <sup>1</sup>H-NMR spectrum of *trans*-stilbene **4** (500 MHz, CDCl<sub>3</sub>, r.t.).

## 2. X-ray Crystallographic Data

A single crystal of Ru(**MC33**)(CO)<sub>2</sub>(H<sub>2</sub>O) was obtained by the recrystallization from water vapor diffusion into a DMF solution of the compound.

Crystal data of Ru(**MC33**)(CO)<sub>2</sub>(H<sub>2</sub>O): C<sub>34.3</sub>H<sub>41.56</sub>N<sub>3.65</sub>O<sub>11</sub>Ru, red prism, 0.19 × 0.05 × 0.05 mm<sup>3</sup>, triclinic, space group *P*-1 (#2), *a* = 10.629(4) Å, *b* = 12.451(4) Å, *c* = 15.252(5) Å,  $\alpha$  = 68.755(18)°,  $\beta$  = 77.07(2)°,  $\gamma$  = 74.08(2)°, *V* = 1791.5(11) Å<sup>3</sup>,  $\rho_{\text{calcd}}$  = 1.450 g/cm<sup>3</sup>, *Z* = 2, 14821 reflections measured, *R*1 = 0.0490 [*I* > 2σ(*I*)], and *wR*2 = 0.1229 (all reflections), GOF = 0.986.

A single crystal of Ru(**MC33**)(CO)<sub>2</sub>(**P1**) was obtained by recrystallization from a benzene solution.

Crystal data of Ru(**MC33**)(CO)<sub>2</sub>(**P1**): C<sub>51</sub>H<sub>52</sub>N<sub>3</sub>O<sub>11</sub>PRu, orange prism, 0.24 × 0.13 × 0.12 mm<sup>3</sup>, triclinic, space group *P*-1 (#2), *a* = 12.906(8) Å, *b* = 13.325(8) Å, *c* = 14.696(8) Å,  $\alpha$  = 78.66(3)°,  $\beta$  = 73.19(3)°,  $\gamma$  = 84.04(3)°, *V* = 2369(2) Å<sup>3</sup>,  $\rho_{\text{calcd}}$  = 1.423 g/cm<sup>3</sup>, *Z* = 2, 19292 reflections measured, *R*1 = 0.0573 [*I* > 2σ(*I*)], and *wR*2 = 0.1454 (all reflections), GOF = 0.896.

A single crystal of Ru(**MC33**)(CO)(**P2**)<sub>2</sub> was obtained by liquid-liquid diffusion crystallization (CH<sub>2</sub>Cl<sub>2</sub>/hexane = 1/9).

Crystal data of Ru(**MC33**)(CO)[**P2**]<sub>2</sub>·2CH<sub>2</sub>Cl<sub>2</sub>·H<sub>2</sub>O: C<sub>46</sub>H<sub>71</sub>Cl<sub>4</sub>N<sub>3</sub>O<sub>16</sub>P<sub>2</sub>Ru, yellow prism, 0.24 × 0.23 × 0.06 mm<sup>3</sup>, triclinic, space group *P*-1 (#2), *a* = 12.256(3) Å, *b* = 20.547(4) Å, *c* = 23.363(5) Å,  $\alpha$  = 99.334(3)°,  $\beta$  = 99.324(4)°,  $\gamma$  = 98.5572(16)°, *V* = 5635(2) Å<sup>3</sup>,  $\rho_{\text{calcd}}$  = 1.446 g/cm<sup>3</sup>, *Z* = 4, 70352 reflections measured, *R*1 = 0.0761 [*I* > 2σ(*I*)], and *wR*2 = 0.2095 (all reflections), GOF = 1.065.

A single crystal of Ru(**AC**)(CO)<sub>2</sub>(dmf) was obtained by recrystallization from a DMF/water solution.

Crystal data of Ru(**AC**)(CO)<sub>2</sub>(dmf)·DMF: C<sub>28</sub>H<sub>30</sub>N<sub>4</sub>O<sub>8</sub>Ru, yellow prism, 0.15 × 0.15 × 0.11 mm<sup>3</sup>, monoclinic, space group *P*2<sub>1</sub>/*c* (#14), *a* = 10.696(2) Å, *b* = 22.632(5) Å, *c* = 11.846(3) Å,  $\beta$  = 102.617(3)°, *V* = 2798.4(10) Å<sup>3</sup>,  $\rho_{\text{calcd}}$  = 1.547 g/cm<sup>3</sup>, *Z* = 4, 22752 reflections measured, *R*1 = 0.0344 [*I* > 2σ(*I*)], and *wR*2 = 0.0905 (all reflections), GOF = 1.026.
